# Supplementary material for: Epidemiology, Impact and Control of Rabies in Nepal: A Systematic Review
Source: PLoS Negl Trop Dis. 2016 Feb 12;10(2):e0004461. doi: 10.1371/journal.pntd.0004461 (PMC4752342; doi:10.1371/journal.pntd.0004461)
Supplement: S1 File — (XLSX) [file pntd.0004461.s001.xlsx]

## Sheet: SUMMARY
Source	Search String	Search scope	Hits	Date
PubMed	(rabies OR rabid OR dog) AND nepal	All fields	47	2015-09-01
WoK	(rabies OR rabid OR dog) AND nepal	Topic	127	2015-09-02
NepJOL	(rabies OR rabid OR dog)	All	9	2015-09-01
WHO-IRIS	(rabies OR rabid OR dog) AND nepal	Title	8	2015-09-08
UNIQUE			141
ELIGIBLE			137
INCLUDED			36

## Sheet: PubMed
Title	Author	Source	Year	Abstract
Haemaphysalis (Alloceraea) aponommoides Warburton (Ixodoidea: Ixodidae), description of immature stages, hosts, distribution, and ecology in India, Nepal, Sikkim, and China.	Hoogstraal	J Parasitol	1971	NA
New records of Mallophaga from Nepalese mammals.	Emerson	Journal of medical entomology	1971	NA
Ixodes (Ixodes) nuttallianus Schulze: redescription of female, description of male, and hosts and ecology in Nepal (Acarina: Ixodidae).	Clifford	Journal of medical entomology	1971	NA
Susceptibility of a yak to influenza A viruses and presence of H3N2 antibodies in animals in Nepal and India.	Graves	Bulletin of the World Health Organization	1974	Naturally acquired antibody to H3N2 human influenza antigens was found in a yak-zebu crossbred in Nepal. Serial inoculation of a yak, negative for antibody, produced a response to A/Hong Kong/1/68 (H3N2), A/England/42/72 (H3N2), and A/Prague/1/56 (Heq1 Neq1) influenzavirus strains. Single radial diffusion tests showed that cattle and goats in West Bengal, India, and water buffaloes and cattle in …
Human rabies in Kathmandu, Nepal.	Joshi	The Journal of communicable diseases	1981	NA
Trypanosomiasis in a dog imported in The Netherlands.	Hellebrekers	The Veterinary quarterly	1982	A case-report is presented of a Trypanosoma evansi infection in a dog imported from Nepal. The clinical symptoms included fever, anorexia, and weight loss. Diagnosis was made through morphologic study of blood smears from the patient.
Role of lesser developed nations in rabies research.	Joshi	Reviews of infectious diseases	1988	The contributions of lesser developed nations to rabies research can be significant in several areas. The type of health system that supports complex veterinary-public health programs, the operational research that is required in these countries, the follow-up epidemiologic surveillance, and the involvement in technology transfer concerning new rabies vaccines and rapid and simple diagnostic proc…
Accessibility of dog populations for rabies control in Kathmandu valley, Nepal.	Bogel	Bulletin of the World Health Organization	1990	The accessibility of dogs in urban areas of Kathmandu valley was measured using the following approaches: determination of the proportion of dogs that bore signs of having been the objects of religious worship and other signs of household association, supplemented by information obtained by interviewing people in the neighbourhood; and the vaccination coverage attained in a rabies control campaig…
Organisation of veterinary public health in the south Asia region.	Joshi	Revue scientifique et technique (International Office of Epizootics)	1991	In the South Asia region vast human populations are exposed daily and with considerable intensity to close contact with vast animal populations and their excreta. There is no veterinary public health unit in the World Health Organisation (WHO) South-East Asia Regional Office (SEARO) in New Delhi (India), the Western Pacific Regional Office (WPRO) in Manila (Philippines) or the Eastern Mediterrane…
[Imported infestations of nasopharyngeal parasites in dogs].	Gothe	Tierarztliche Praxis	1991	In this paper infestations of the nasal cavity with Myxobdella annandalei in a dog after a sojourn in Nepal and with Linguatula serrata in 2 stray dogs from Turkey, which were imported to Germany, are described.
The ecology of dogs and canine rabies: a selective review.	Wandeler	Revue scientifique et technique (International Office of Epizootics)	1993	Although dogs are the most widespread and abundant of all carnivores, the role of the dog in human cultures and its impact on the environment have rarely been studied. These subjects are reviewed in the context of canine rabies. To understand the epizootiology of canine rabies, the ecology and population biology of the dog must be considered. Information on dog populations (in relation to differe…
Echinococcus granulosus infections in the dogs of Kathmandu, Nepal.	Baronet	Annals of tropical medicine and parasitology	1994	The prevalence, incidence and risk factors of infection by Echinococcus granulosus were studied in the domestic and street dogs of Kathmandu, Nepal. Using an ELISA coproantigen test as a screening method, the highest prevalence (5/88 = 5.7%) was seen in domestic dogs from an area of the city used for slaughtering livestock. A prevalence of 1.8% (3/171) was found in domestic dogs seen at eight vet…
Human rabies--New Hampshire, 1996.	NA	MMWR. Morbidity and mortality weekly report	1997	On August 20, 1996, a 32-year-old resident of New Hampshire died in a Massachusetts hospital from an illness characterized by rapid neurologic deterioration. Rabies had been clinically suspected on the date of her transfer from a New Hampshire hospital (August 14) and was confirmed by CDC on August 17. This report summarizes the investigation of this case by the state health departments of New Ha…
Epidemiology of echinococcosis in Nepal.	Joshi	The Southeast Asian journal of tropical medicine and public health	1997	Echinococcosis and hydatidosis is a parasitic zoonotic disease of human and animals. This disease has created public health and environment problems in all urban areas of Nepal. Based on the three year study (1993-1995) it has been revealed that the epidemiological cycle (indigenous) of Echinococcus granulosus parasite is dog-pig-dog cycle and human acquire infection accidentally through infected…
Case records of the Massachusetts General Hospital. Weekly clinicopathological exercises. Case 21-1998. A 32-year-old woman with pharyngeal spasms and paresthesias after a dog bite.	NA	The New England journal of medicine	1998	NA
Short report: An imported case of cystic echinococcosis in Japan diagnosed by imaging and serology with confirmation of Echinococcus granulosus-specific DNA sequences.	Ito	The American journal of tropical medicine and hygiene	1998	We report one case of cystic echinococcosis (CE) in Japan in a native of Nepal. Ultrasonography and computed tomography scan of the liver revealed unique cystic lesions with or without daughter cysts of Echinococcus granulosus. Immunoblot analysis using crude antigens of E. multilocularis and cyst fluid of E. granulosus, without reference to these image analyses, strongly suggested this was a cas…
Case 21-1998: rabies.	Shlim	The New England journal of medicine	1999	NA
Attempts to establish experimental Cyclospora cayetanensis infection in laboratory animals.	Eberhard	The Journal of parasitology	2000	Attempts were made to develop an animal model for Cyclospora cayetanensis to identify a practical laboratory host for studying human cyclosporiasis. Oocysts collected from stool of infected humans in the United States, Haiti, Guatemala, Peru, and Nepal were held in potassium dichromate solution to allow development of sporozoites. The following animal types were inoculated: 9 strains of mice, inc…
Characterization of Sri Lanka rabies virus isolates using nucleotide sequence analysis of nucleoprotein gene.	Arai	Acta virologica	2001	Thirty-four suspected rabid brain samples from 2 humans, 24 dogs, 4 cats, 2 mongooses, I jackal and I water buffalo were collected in 1995-1996 in Sri Lanka. Total RNA was extracted directly from brain suspensions and examined using a one-step reverse transcription-polymerase chain reaction (RT-PCR) for the rabies virus nucleoprotein (N) gene. Twenty-eight samples were found positive for the viru…
Emerging pathogen Cyclospora cayetanensis infection in Nepal.	Sherchand	The Southeast Asian journal of tropical medicine and public health	2001	Cylospora cayetanensis, an emerging parasitic pathogen of human is being increasingly recognized throughout the world, however the means of transmission and the possibility of a reservoir host remain an enigma. A longitudinal study on cyclosporiasis in different parts of Nepal was carried out from April, 1995 until November, 2000. Fecal specimens were collected from symptomatic and asymptomatic p…
Risk factors associated with bronchial asthma in school going children of rural Haryana.	Pokharel	Indian journal of pediatrics	2001	Bronchial asthma is one of the most common illnesses in children. Factors influencing development of asthma have not been studied in rural population. 2000 school going children from five schools of Chhainsa and Dayalpur Primary Health Centre area in Ballabgarh Block of Haryana state were screened for presence of symptoms of asthma using a questionnaire suggested by International Study of Asthma …
Screening of Nepalese medicinal plants for antiviral activity.	Rajbhandari	Journal of ethnopharmacology	2001	In an ethnopharmacological screening, plants used in Nepalese traditional medicine were evaluated for antiviral activity. Methanolic and methanolic-aqueous extracts derived of 23 species were assayed in two in vitro viral systems, influenza virus/MDCK cells and herpes simplex virus/Vero cells. Two species, Bergenia ligulata and Nerium indicum showed the highest antiinfluenzaviral activity with 50…
Risk of possible exposure to rabies among tourists and foreign residents in Nepal.	Pandey	Journal of travel medicine	2002	BACKGROUND: There is little data available on the actual risk to travelers of being possibly exposed to rabies. This data would be useful in advising travelers who are considering rabies pre-exposure immunization. In addition, it is not known how many travelers are already pre-immunized when they are bitten by a possibly rabid animal. The current study was performed to determine the rate at which…
Enzyme-linked immunosorbent assay based on soluble promastigote antigen detects immunoglobulin M (IgM) and IgG antibodies in sera from cases of visceral and cutaneous leishmaniasis.	Ryan	Journal of clinical microbiology	2002	Leishmaniasis causes significant morbidity and mortality in areas where it is endemic. In areas where it is nonendemic, global travel and increased incidence of the disease in human immunodeficiency virus and intravenous-drug user populations are also causes for concern. The unavailability of rapid and reliable tests for diagnosis of the various leishmaniases makes patient management difficult. W…
A study on 'Vermiform Appendix'--a caecal appendage in common laboratory mammals.	Malla	Kathmandu University medical journal (KUMJ)	2003	The vermiform appendix, a small structure without any known function in human being has been regarded as a vestigial remnant of a more developed distal caecum in man's herbivorous ancestors. A detailed study of the morphological and histological changes in the appendix and the caecum of different mammals with varying dietary habits revealed a distinctly well-defined vermiform appendix in rabbit o…
Survey of the stray dog population and the health education program on the prevention of dog bites and dog-acquired infections: a comparative study in Nepal and Okayama Prefecture, Japan.	Kato	Acta medica Okayama	2003	We estimated the number of stray dogs in Kathmandu, Nepal, where human rabies cases still occur, and in Shimotsui, Okayama Prefecture, Japan. In Kathmandu, the stray dog density was 2,930 stray dogs/km2, and the ratio of stray dogs to humans was 1:4.7. In Shimotsui, the density was 225 stray dogs/km2, and the ratio was 1:5.2. Since the stray dog population in Nepal is very large, one of the measu…
Improving meat inspection and control in resource-poor communities: the Nepal example.	Joshi	Acta tropica	2003	Meat is an important source of protein and a valuable commodity in resource-poor communities. In many developing countries, lack of appropriate slaughtering facilities and unsatisfactory slaughtering techniques are causing unnecessary losses of meat as well as invaluable by-products from animal carcasses. Slaughtering places are frequently contaminated and may not be protected against dogs, roden…
Inhibitory effect of Bergenia ligulata on influenza virus A.	Rajbhandari	Die Pharmazie	2003	Methanol water extract from rhizomes of Bergenia ligulata, a plant used in Nepalese ethnomedicine, inhibited in vitro the replication of influenza virus in a dose dependent manner and did not show virucidal activity at effective concentration. Pretreatment of cells with B. ligulata extract was shown to be most effective to prevent cell destruction. The extract inhibited viral RNA synthesis and re…
Detection of Cyclospora cayetanensis in animal fecal isolates from Nepal using an FTA filter-base polymerase chain reaction method.	Chu	The American journal of tropical medicine and hygiene	2004	Cyclospora cayetanensis is an emerging protozoan parasite capable of causing a protracted diarrheal illness in both immunocompromised and immunocompetent individuals. Ingestion of fresh produce and water sources contaminated with mature sporulated oocysts results in acquisition of cyclosporiasis. Currently, no animal model exists for the study of this pathogenic parasite and the only confirmed re…
Buffalo rabies in Nepal.	Jha	The Veterinary record	2004	NA
Ancient wolf lineages in India.	Sharma	Proceedings. Biological sciences / The Royal Society	2004	All previously obtained wolf (Canis lupus) and dog (Canis familiaris) mitochondrial (mt) DNA sequences fall within an intertwined and shallow clade (the 'wolf-dog' clade). We sequenced mtDNA of recent and historical samples from 45 wolves from throughout lowland peninsular India and 23 wolves from the Himalayas and Tibetan Plateau and compared these sequences with all available wolf and dog seque…
[Epidemiology of rabies virus and other lyssaviruses].	Arai	Nihon rinsho. Japanese journal of clinical medicine	2005	Rabies is a zoonosis that infects domestic and wild animals through close contacts with saliva from infected animals. The annual number of deaths worldwide caused by rabies is estimated approximately 55,000 by World Health Organization (WHO). There has been no indigenous rabies case in Japan since 1957; however, there was only one imported case, a traveler who was bitten by a stray dog in Nepal a…
Trypanosomiasis in domestic animals of Makwanpur district, Nepal.	Maharjan	Annals of the New York Academy of Sciences	2006	Trypanosomiasis is an infectious emerging hemoprotozoan parasitic disease in domestical animals of Nepal. The prevalence of disease was found in 16 of 240 (6.67%) in domestic animals of Makawanpur district, out of which 9 of 105 were (8.57%) cattle; 5 of 75 (6.67%) buffalos, and 2 of 15 (13.3%) dogs, while none of the goats and pigs acquired infection. The disease was found maximum during rainy s…
Rabies antibody seroprotection rates among travelers in Nepal: "rabies seroprotection in travelers".	Ranney	Journal of travel medicine	2006	BACKGROUND: Rabies preexposure immunization is recommended for international travelers who are at risk for exposure to rabid animals, especially in areas where postexposure treatment may be limited. Rabies antibody seroprotection rates among international travelers has not been previously investigated. OBJECTIVE: To assess preexisting rabies seroprotection among travelers presenting to a health c…
Occurrence of hydatidosis in slaughter buffaloes (Bos bubalis) and helminths in stray dogs in Kathmandu Valley, Nepal.	Manandhar	Berliner und Munchener tierarztliche Wochenschrift	2006	The study aimed at identifying the occurrence of hydatidosis in slaughter buffaloes and helminth eggs, particularly Taenia spp. eggs in stray dogs' fecal samples in Kathmandu Valley, Nepal. The study period was from November, 2004 to April, 2005. A total of 500 buffalo carcasses in a slaughterhouse, at the riversides and individual butchers'sites were examined for the presence of hydatid cysts. T…
Leishmaniasis vaccine candidates for development: a global overview.	Khamesipour	The Indian journal of medical research	2006	A vaccine against different forms of leishmaniasis should be feasible considering the wealth of information on genetics and biology of the parasite, clinical and experimental immunology of leishmaniasis, and the availability of vaccines that can protect experimental animals against challenge with different Leishmania species. However, there is no vaccine against any form of leishmaniasis for gene…
Asthma symptomatics school children of Sonapur.	Pokharel	Kathmandu University medical journal (KUMJ)	2007	BACKGROUND: Bronchial asthma is one of the most common illnesses in children. Factors influencing development of asthma have not been studied in rural population. MATERIALS AND METHODS: Two thousand school-going children from three schools of Sonapur VDC, Sunsari in the surrounding of industries were screened for the presence of symptoms of asthma using a questionnaire suggested by International …
Environmental hazards in Nepal: altitude illness, environmental exposures, injuries, and bites in travelers and expatriates.	Boggild	Journal of travel medicine	2007	BACKGROUND: Adventure travel necessarily places travelers at risk of environmental hazards. We assessed the burden of "environmental" hazards among a cohort of travelers and expatriates presenting to a large travel clinic in Nepal. METHODS: Data on travelers and expatriates seen at the Canadian International Water and Energy Consultants (CIWEC) clinic in Kathmandu were prospectively collected and…
Antibacterial and antiviral naphthazarins from Maharanga bicolor.	Rajbhandari	Die Pharmazie	2007	Maharanga bicolor, Boraginaceae, is used in the Nepalese ethnomedicine for the treatment of several diseases. In the course of screening investigations the dichloromethane extract of the roots of Maharanga bicolor was found to inhibit the growth of gram positive bacteria. Bio-assay directed fractionation led to the isolation of five active naphthazarins, deoxyalkannin (1), alkannin (2), acetylalk…
Bony hydatid disease of superior pubic ramus with extension into pelvis and proximal thigh.	Khan	JNMA; journal of the Nepal Medical Association	2008	Hydatid disease is caused by the tapeworm of genus ;Echinococcus. Genus Echinococcus has different species including Echinococcus vogeli, Echinococcus granulosus and Echinococcus multilucularis. Echinococcus granulosus is the most common cause of hydatid disease in humans. This disease can take place either directly through ingestion of parasite eggs from contact with infected dogs or indirectly …
The first imported case of rabies into Japan in 36 years: a forgotten life-threatening disease.	Yamamoto	Journal of travel medicine	2008	A domestic case of rabies has not been reported in Japan since 1957. The last case of rabies reported in Japan was an imported case from Nepal in 1970. We recently experienced a new case imported from the Philippines, the first case in Japan in 36 years. Although Japanese people are about to forget the dangers of rabies, this case should serve as a warning to those Japanese who are planning a tri…
Human Rabies in the WHO Southeast Asia Region: Forward Steps for Elimination.	Gongal	Advances in preventive medicine	2011	There are eleven Member States in the WHO southeast Asia region (Bangladesh, Bhutan, Democratic People's Republic of Korea, India, Indonesia, Maldives, Myanmar, Nepal, Sri Lanka, Thailand, Timor-Leste) of which eight are endemic for rabies. More than 1.4 billion people in the Region are at risk of rabies infection, and approximately 45% of worldwide rabies deaths occur in Asia. Dog bites account …
Characterization of rabies virus from a human case in Nepal.	Pant	Archives of virology	2011	Rabies is endemic throughout most of Asia, with the majority of human cases transmitted by domestic dogs (Canis familiaris). Here, we report a case of rabies in a 12-year-old girl in the Lalitpur district of Nepal that might have been prevented by better public awareness and timely post-exposure prophylaxis. Molecular characterization of the virus showed 100% identity over a partial nucleoprotein…
Recent emergence and spread of an Arctic-related phylogenetic lineage of rabies virus in Nepal.	Pant	PLoS neglected tropical diseases	2013	Rabies is a zoonotic disease that is endemic in many parts of the developing world, especially in Africa and Asia. However its epidemiology remains largely unappreciated in much of these regions, such as in Nepal, where limited information is available about the spatiotemporal dynamics of the main etiological agent, the rabies virus (RABV). In this study, we describe for the first time the phylog…
Evaluation of intradermal vaccination at the anti rabies vaccination OPD.	Mankeshwar	Nepal Med Coll J	2014	Rabies is a virtually 100% fatal acute viral encephalitis caused by an RNA virus belonging to family Rhabdoviridae and genus Lyssavirus. The virus can infect all warm blooded animals. The disease is transmitted to humans by the bite, lick or scratch of an infected animal. More than 99% of all human rabies deaths occur in the developing world. It is preventable with timely and proper usage of mode…
Animal-associated exposure to rabies virus among travelers, 1997-2012.	Gautret	Emerg Infect Dis	2015	Among travelers, rabies cases are rare, but animal bites are relatively common. To determine which travelers are at highest risk for rabies, we studied 2,697 travelers receiving care for animal-related exposures and requiring rabies postexposure prophylaxis at GeoSentinel clinics during 1997-2012. No specific demographic characteristics differentiated these travelers from other travelers seeking …
Vector and reservoir control for preventing leishmaniasis.	González	Cochrane Database Syst Rev	2015	BACKGROUND: Leishmaniasis is caused by the Leishmania parasite, and transmitted by infected phlebotomine sandflies. Of the two distinct clinical syndromes, cutaneous leishmaniasis (CL) affects the skin and mucous membranes, and visceral leishmaniasis (VL) affects internal organs. Approaches to prevent transmission include vector control by reducing human contact with infected sandflies, and reser…

## Sheet: WoK
Title	Author	Source	Year	Abstract
Gnathostomiasis in a dog	VARMA	CURRENT SCI	1955	NA
Gnathostomiasis in a dog.	Varma	Current Science	1955	NA
Identity, distribution, and hosts of Haemaphysalis (Rhipi-stoma) indica Warburton (resurrected) (Ixodoidea : Ixodidae), a carnivore parasite of the Indian subregion.	HOOGSTRAAL	Journal of Parasitology	1970	The following is based partly on the author's abstract. Haemaphysalis indica Warb., which was originally described as a variety of H. leachii (Aud.) and is stated to have been frequently misidentified, is redescribed from males, females, nymphs and larvae taken between sea level and 1, 500 ft in the east of West Pakistan, India, Ceylon and southern Nepal and is raised to specific rank. The hosts …
NEW RECORDS OF MALLOPHAGA FROM NEPALESE MAMMALS	EMERSON	JOURNAL OF MEDICAL ENTOMOLOGY	1971	NA
IXODES (IXODES) NUTTALLIANUS SCHULZE - REDESCRIPTION OF FEMALE, DESCRIPTION OF MALE, AND HOSTS AND ECOLOGY IN NEPAL (ACARINA-IXODIDAE)	CLIFFORD	JOURNAL OF MEDICAL ENTOMOLOGY	1971	NA
HAEMAPHSALIS-(ALLOCERAEA)-APONOMMOIDES WARBURTON (IXODOIDEA-IXODIDA E), DESCRIPTION OF IMMATURE STAGES, HOSTS, DISTRIBUTION, AND ECOLOGYIN INDIA, NEPAL, SIKKIM, AND CHINA	HOOGSTRA.H	JOURNAL OF PARASITOLOGY	1971	NA
CLINICAL AND EPIDEMIOLOGICAL OBSERVATIONS ON AN OUTBREAK OF PLAGUE IN NEPAL	LAFORCE	BULLETIN OF THE WORLD HEALTH ORGANIZATION	1971	NA
HAEMAPHYSALIS-(ALLOPHYSALIS)-WARBURTONI NUTTALL-DESCRIPTION OF IMMATURE STAGES, ADULT STRUCTURAL VARIATION, AND HOSTS AND ECOLOGY IN NEPAL, WITH A REDEFINITION OF SUBGENUS ALLOPHYSALIS HOOGSTRAAL (IXODOIDEA-IXODIDAE)	HOOGSTRA.H	JOURNAL OF PARASITOLOGY	1971	NA
[Buffaloes in Nepal.].	Leue	Tierarztliche Umschau	1971	The wild buffalo of Nepal. A relative of the indian Bubalis bubalis is a ploughing animal and a source of dung and milk (av. yield: 400-500 kg milk per lactation). The total population is about 3.3 million. The husbandry methods employed in the upkeep of these animals are briefly described and the more important diseases discussed. Fairly common puerperal complications are uterine torsion and pro…
IXODES (PARTIPALPIGER) OVATUS NEUMANN, SUBGENUS NOV - IDENTITY, HOSTS,ECOLOGY, AND DISTRIBUTION (IXODOIDEA-IXODIDAE)	HOOGSTRA.H	JOURNAL OF MEDICAL ENTOMOLOGY	1973	NA
SUSCEPTIBILITY OF A YAK TO INFLUENZA-A VIRUSES AND PRESENCE OF H3N2 ANTIBODIES IN ANIMALS IN NEPAL AND INDIA	GRAVES	BULLETIN OF THE WORLD HEALTH ORGANIZATION	1974	NA
On the cestode Taenia hydatigena from the wild dog in Nepal.	Sawada	Japanese Journal of Tropical Medicine and Hygiene	1975	Taenia hydatigena was found in the small intestine of a wild dog caught in Katmandu, Nepal. This is the first report of this cestode from the wild dog in Nepal.
Domestic animals of Nepal.	Epstein	Domestic animals of Nepal.	1977	Professor Epstein is well known as a writer of books on breeds of livestock; his books on Africa and China are classics. It is, therefore, a pleasure to welcome another of his contributions to the inventory of the animal genetic resources of the developing world. As Dr Boerma, lately Director-General of FAO, says in his foreword, Nepal may seem a small country compared with its giant neighbours, …
Records of Hippoboscidae (Diptera) from Nepal.	Mogi	Japanese Journal of Sanitary Zoology	1977	NA
A study of the weed problem at Rampur, Chitwan, Nepal.	Gupta	Journal of the Institute of Agriculture and Animal Science	1977	A weed survey was conducted during 1976-1977 at Rampur (Chitwan) in the major crops of the area and in some non-crop situations. Sixty-three major weed species were found to infest these situations. Of these 15 belonged to the Gramineae and 15 to the Cyperaceae. Twelve perennial weed species were found in the weed flora. Of the major crops of Rampur, paddy and maize were most infested with weeds.…
Response of wheat, rape and potato to weeding at Rampur, Chitwan, Nepal.	Shivakoti	IAAS [Institute of Agriculture and Animal Science] Journal	1977	Three field trials were conducted in rabi, one each in wheat, Toria rape [Brassica campestris var. Toria] and potato to study their response to weed-free conditions. It was found that under Rampur (Nepal) conditions rabi crops were infested with only a single flush of weeds. When these weeds were removed manually, 45 days after sowing in the case of wheat and 32 days in the case of rape, signific…
TOXOCARA GRANULOMA OF THE RETINA	UPADHYAY	JAPANESE JOURNAL OF OPHTHALMOLOGY	1980	NA
Human rabies in Kathmandu, Nepal.	Joshi	The Journal of communicable diseases	1981	NA
A killer disease in dogs [in Nepal, probably canine parvovirus infection].	Singh	Bulletin of Veterinary Science & Animal Husbandry, Nepal	1981	NA
Control of gid in goats.	Shah	Bulletin of Veterinary Science & Animal Husbandry, Nepal	1981	NA
TRYPANOSOMIASIS IN A DOG IMPORTED IN THE NETHERLANDS	HELLEBREKERS	VETERINARY QUARTERLY	1982	NA
An analysis of the husbandry system in the Himalayan foothills - the example of Salme in Nepal.	Berthet-Bondet	Analyse du systeme d'elevage dans les collines prehimalayennes - le cas	1983	Only a small part of this thesis is devoted to the breeding and performance of livestock in the Salme area. There are descriptions (taken mainly from the literature) of the cattle, buffaloes, sheep, goats, pigs, dogs and fowls, illustrated by photographs, and brief consideration of management practices. Jerseys have been introduced for crossing with the local cattle. For 25, 17, 4 and 4 lactation…
Grain and straw yields of wheat, economics of the system and nutrient status of the soil as influenced by residual fertility of clusterbean (guar) and direct fertilization of wheat.	Regmi	Nepalese Journal of Agriculture	1984	At the Indian Agricultural Research Institute, New Delhi in the kharif [monsoon] and rabi [winter] seasons of 1982-83, the responses of Cyamopsis tetragonoloba grown for fodder and seed to 0 or 50 kg P 2O 5/ha, of a subsequent wheat crop to the residual effect of C. tetragonoloba and of wheat to 0, 60 or 120 kg N and 0 or 50 kg P 2O 5/ha were recorded. Crop response to P occurred in soils with lo…
Nepal.	Lamichhane	Veterinary viral diseases, their significance in South-East Asia and the	1985	In 1983-84 the following strains of foot and mouth disease virus were isolated in Nepal: type O (8 isolates), type A (7 isolates) and type Asia-1 (2 isolates). Rabies is an important public health and veterinary problem, the sylvatic source is the most important but stray dogs are the main carriers. In 1983-84, 10 of 29 suspect cases were positive for rabies. Newcastle disease caused 79 confirmed…
RABIES IN SOUTHEAST ASIA	BAHNEMANN H G	KUWERT, E. ET AL. (ED.). RABIES IN THE TROPICS; INTERNATIONAL	1985	NA
ROLE OF LESSER DEVELOPED NATIONS IN RABIES RESEARCH	JOSHI	REVIEWS OF INFECTIOUS DISEASES	1988	NA
SCREENING OF CRUDE DRUGS USED IN NEPAL FOR NEMATOCIDAL ACTIVITY ON THE LARVA OF TOXOCARA-CANIS	KIUCHI F	Shoyakugaku Zasshi	1989	Hot water extracts of 160 crude drugs used in Nepal were tested for their in vitro nematocidal activity on the second-stage larva of the dog roundworm, Toxocara canis, which is a common pathogenic parasite in larva migrans. Twenty-two of them showed a potent nematocidal activity (RM = 0, after 24 h incubation), and the activities of "Bojho" (rhizome of Acorus calamus L.) and "Pan ko Jara" (rhizom…
ACCESSIBILITY OF DOG-POPULATIONS FOR RABIES CONTROL IN KATHMANDU VALLEY, NEPAL	BOGEL	BULLETIN OF THE WORLD HEALTH ORGANIZATION	1990	The accessibility of dogs in urban areas of Kathmandu valley was measured using the following approaches: determination of the proportion of dogs that bore signs of having been the objects of religious worship and other signs of household association, supplemented by information obtained by interviewing people in the neighbourhood; and the vaccination coverage attained in a rabies control campaig…
ACCESSIBILITY OF DOG POPULATIONS FOR RABIES CONTROL IN KATHMANDU VALLEY NEPAL	BOEGEL K	Bulletin of the World Health Organization	1990	NA
CHEESE, TOURISTS, AND RED PANDAS IN THE NEPAL HIMALAYAS	YONZON	CONSERVATION BIOLOGY	1991	Langtang National Park in the Nepal Himalayas provides resources for about 30,000 people living in and around the park. The park is the site of two cheese factories that produce 14,000 kg of cheese per year for marketing in Kathmandu. The factories collect about 140,000 liters of milk annually and use well over 100,000 kg of fuel wood to process the milk into cheese. Loans and one-year advance pa…
RABIES IMMUNOPROPHYLAXIS STRATEGY IN TRAVELERS	SHLIM	JOURNAL OF WILDERNESS MEDICINE	1991	We present data from a two-year study of foreign travelers with possible exposure to rabies virus who presented to the only clinics in Nepal that provided modern rabies vaccine. Of 395 000 foreign tourists and residents who visited Nepal during the study period, 62 required post-exposure rabies immunoprophylaxis. Dog bites accounted for 76% of the exposures, while 20% were due to monkey bites. Si…
[Imported infestations of nasopharyngeal parasites in dogs].	Gothe	Tierarztliche Praxis	1991	In this paper infestations of the nasal cavity with Myxobdella annandalei in a dog after a sojourn in Nepal and with Linguatula serrata in 2 stray dogs from Turkey, which were imported to Germany, are described.
CONSERVATION OF THE RED PANDA AILURUS-FULGENS	YONZON	BIOLOGICAL CONSERVATION	1991	The red panda Ailurus fulgens is a species of special interest because it is taxonomically distinct (probably a monotypic subfamily) and may be threatened with extinction, at least in the Himalayan portion of its range. During a two-year study in Langtang National Park, Nepal, red pandas were habitat specialists that preferred fir-jhapra bamboo forests between 2800 and 3900 m (92% of radio locati…
Scientific and Technical Review International Office of Epizootics, Vol. 11. No. 3	International Office Of Epizootics	[Scientific and Technical Review International Office of Epizootics]	1992	This volume contains 26 papers examining various topics in veterinary medicine. The series focuses on infectious diseases, international epidemiology, and specific control and treatment regimes in agricultural animals. Some of the countries from which research is reported include Australia, Cameroon, Nepal, Egypt, and Argentina. Some of the infectious diseases discussed include foot and mouth dis…
Diseases of cattle and buffaloes in the Koshi hills of Nepal. A retrospective study.	Thakuri	Veterinary Review (Kathmandu)	1992	Records of 91 562 clinical cases (75 412 cattle and 16 150 buffaloes) seen in 1985-1990 at the veterinary hospitals of 4 Koshi hill districts showed that the major clinical conditions were: parasitic diseases (37 521 cattle, 11 766 buffaloes), infectious diseases (22 741 and 469, respectively), and general debility (4543 and 1327, respectively). Of the 23 029 cases of helminth parasites recorded …
Genetic diversity in lablab bean	Birari	Journal of Maharashtra Agricultural Universities	1992	The genetic diversity in a population of 36 genetic stocks of Lablab bean, Lablab purpureus (L.) Sweet, from diverse geographic sources were grouped in 7 constellations utilizing 15 quantitative characters by D2 statistic and canonical test. CO 5 and No.692 were highly divergent from all others for their yields, Habbal 3 for earliness, CO 1 for high seed number and 269, EC 18176 and Golangaon loc…
The ecology of dogs and canine rabies: a selective review.	Wandeler	Revue Scientifique et Technique Office International des Epizooties	1993	NA
Clinical tropical medicine.	Cowan	Clinical tropical medicine.	1993	The Royal Army Medical Corps (RAMC) has a considerable tradition in producing texts on "tropical medicine". An early contributor from the British Army was Sir John Pringle whose monumental work "Observations on the diseases of the army" first published in 1752 went to 7 editions; more recent tomes include: L. Rogers and J.W.D. Megaw (1930), and W.H. Hargreaves and R.J.G. Morrison (1965). Tropical…
Epidemiology of rabies in Kathmandu Valley, 1989/90-91/92.	Gongal	JNMA, Journal of the Nepal Medical Association	1993	The Kathmandu valley in Nepal has an area of only 899 km in which 1.1 million people live with their dogs, whose domestic numbers alone are estimated to be about 30 000. These conditions provide the classic ecosystem for the generation and maintenance of a canine rabies cycle. Overpopulation and uncontrolled urbanization produce vast quantities of human food waste. Owned and stray dogs, as well a…
Examination of taeniid metacestodes from the Far East, with the description of Taenai kotlani sp. n. (Cestoda: Taeniidae)	Murai	Parasitologia Hungarica	1993	The metacestodes of Taenia kotlani sp. n. from Mongolian ibex (Capra ibex sibirica Pallas, 1776), and the metacestodes of Taenia parenchymatosa Pushmenkov, 1945 from the lungs of Siberian roe deer (Capreolus pygargus (Pallas, 1771)), which is a new intermediate host, are described. As comparative material adult and larval Taenia hydatigena Pallas, 1766 from Hungary were studied. For specific diff…
The ecology of dogs and canine rabies: A selective review	Wandeler	[Scientific and Technical Review International Office of Epizootics;	1993	NA
Examination of taeniid metacestodes from the far east, with a description of Taenia kotlani sp. n. (Cestoda: Taeniidae).	Murai	Parasitologia Hungarica	1993	The metacestode of Taenia kotlani sp. nov. is described and figured from the lungs and body cavity of Capra ibex sibirica from Mongolia. It is compared with larval and adult Taenia hydatigena from Hungary. It most closely resembles Cysticercus dromedarii, (the adult of which is thought to be Taenia crocutae), and Taenia hyaenae. It is thought that the adult stage of T. kotlani may be the same as …
ECHINOCOCCUS-GRANULOSUS INFECTIONS IN THE DOGS OF KATHMANDU, NEPAL	BARONET	ANNALS OF TROPICAL MEDICINE AND PARASITOLOGY	1994	The prevalence, incidence and risk factors of infection by Echinococcus granulosus were studied in the domestic and street dogs of Kathmandu, Nepal. Using an ELISA coproantigen test as a screening method, the highest prevalence (5/88=5.7%) was seen in domestic dogs from an area of the city used for slaughtering livestock. A prevalence of 1.8% (3/171) was found in domestic dogs seen at eight veter…
Human rabies--New Hampshire, 1996.	Centers For Disease Control (Usa)	MMWR. Morbidity and mortality weekly report	1997	On August 20, 1996, a 32-year-old resident of New Hampshire died in a Massachusetts hospital from an illness characterized by rapid neurologic deterioration. Rabies had been clinically suspected on the date of her transfer from a New Hampshire hospital (August 14) and was confirmed by CDC on August 17. This report summarizes the investigation of this case by the state health departments of New Ha…
Human rabies: New Hampshire, 1996	Centers For Disease Control (Usa)	Morbidity and Mortality Weekly Report	1997	NA
Epidemiology of echinococcosis in Nepal.	Joshi	The Southeast Asian journal of tropical medicine and public health	1997	Echinococcosis and hydatidosis is a parasitic zoonotic disease of human and animals. This disease has created public health and environment problems in all urban areas of Nepal. Based on the three year study (1993-1995) it has been revealed that the epidemiological cycle (indigenous) of Echinococcus granulosus parasite is dog-pig-dog cycle and human acquire infection accidentally through infected…
International travel with pets. Part II. The threat of foreign pathogens	Hendrix	COMPENDIUM ON CONTINUING EDUCATION FOR THE PRACTICING VETERINARIAN	1998	This article reviews an assortment of foreign pathogens that have been introduced into the United States (or other countries) by the pets of unwitting owners. These pathogens may be rickettsiae, protozoans, schistosomes, dipteran fly larvae, filarial parasites, ticks, fleas, or leeches. Each pathogen is discussed according to geographic distribution, clinical presentation, diagnosis, treatment, a…
Case records of the Massachusetts General Hospital. Weekly clinicopathological exercises. Case 21-1998. A 32-year-old woman with pharyngeal spasms and paresthesias after a dog bite.	[Anonymous]	The New England journal of medicine	1998	NA
Short report: An imported case of cystic echinococcosis in Japan diagnosed by imaging and serology with confirmation of Echinococcus granulosus-speclfic DNA sequences	Ito	AMERICAN JOURNAL OF TROPICAL MEDICINE AND HYGIENE	1998	We report one case of cystic echinococcosis (CE) in Japan in a native of Nepal. Ultrasonography and computed tomography scan of the liver revealed unique cystic lesions with or without daughter cysts of Echinococcus granulosus. Immunoblot analysis using crude antigens of E. multilocularis and cyst fluid of E. granulosus, without reference to these image analyses, strongly suggested this was a cas…
Sandflies species distribution, biting activities and feeding habits in kala-azar affected areas of southern Nepal.	Joshi	JNMA, Journal of the Nepal Medical Association	1998	An entomological study of visceral leishmaniasis was conducted in rural villages in southern Nepal to determine the distribution of sandfly fauna, their bionomics and their feeding host preferences. The species composition of collected sandflies was Phlebotomus papatasi, P. argentipes and Sergentomyia babu. P. papatasi was the predominant species in all of the collection sites. It was found that …
Taxonomic study of the genus Ctenocephalides Stiles & Collins, 1930 (Insecta : Siphonaptera : Pulicidae) by using aedeagus characters	Menier	JOURNAL OF MEDICAL ENTOMOLOGY	1998	To define more accurately the taxonomic position of the species of Ctenocephalides Stiles & Collins, 1930 (Siphonaptera), a morphological study of the aedeagus vias conducted, on all taxa of this genus. Based on some phallosome structures (hamulus, lobes, tubus interior), an identification key is constructed to complement the existing taxonomic criteria. C. orientis and C. damarensis are confirme…
Mange infestation and its treatment in Sinhal goats of migratory flocks of Lamjung and Kaski districts of western Nepal.	Ghimire	Veterinary Review (Kathmandu)	1998	Outbreaks of mange were recorded in some of the migratory flocks of Lamjung and Kaski districts of Nepal during 1990-91. These outbreaks, in some of the flocks, were investigated to elucidate the nature of the disease. The morbidity and case fatality rate of mange among the goats inspected in 3 village flocks (167, 312, 682 goats inspected) were 49.4, 14.9 and 27.9, and 62.2, 32.7 and 40.8, respe…
Case 21-1998: Rabies	Shlim	NEW ENGLAND JOURNAL OF MEDICINE	1999	NA
Attempts to establish experimental Cyclospora cayetanensis infection in laboratory animals	Eberhard	JOURNAL OF PARASITOLOGY	2000	Attempts were made to develop an animal model for Cyclospora cayetanensis to identify a practical laboratory host for studying human cyclosporiasis. Oocysts collected from stool of infected humans in the United States, Haiti, Guatemala, Peru, and Nepal were held in potassium dichromate solution to allow development of sporozoites. The following animal types were inoculated: 9 strains of mice, inc…
Genetic variability and heritability studies and scope for improvement in chickpea	Nimbalkar	Journal of Maharashtra Agricultural Universities	2000	NA
Epidemiology of rabies and echinococcosis in Nepal.	Joshi	Proceedings of the 9th Symposium of the International Society for	2000	NA
Oral rabies vaccine - a possible promise for canine rabies control in Nepal.	Gongol	Veterinary Review (Kathmandu)	2000	NA
Participatory evaluation by farmers of on-farm seed priming in wheat in India, Nepal and Pakistan	Harris	EXPERIMENTAL AGRICULTURE	2001	The mean time for 50% germination at 20 degrees C of 12 Indian wheat (Triticum aestivum) cultivars was nearly halved, from 51 h to 27 h, by soaking seed in water for 8 h prior to sowing. A delay of 24 h without further soaking, intended to simulate postponement of sowing, reduced the time saved by priming to 16%. Priming had no effect on final germination percentage. These results were used in th…
Screening of Nepalese medicinal plants for antiviral activity	Rajbhandari	JOURNAL OF ETHNOPHARMACOLOGY	2001	In an ethnopharmacological screening, plants used in Nepalese traditional medicine were evaluated for antiviral activity. Methanolic and methanolic-aqueous extracts derived of 23 species were assayed in two in vitro viral systems, influenza virus/MDCK cells and herpes simplex virus/Vero cells. Two species, Bergenia ligulata and Nerium indicum showed the highest antiinfluenzaviral activity with 50…
Characterization of Sri Lanka rabies virus isolates using nucleotide sequence analysis of nucleoprotein gene	Arai	ACTA VIROLOGICA	2001	Thirty-four suspected rabid brain samples from 2 humans, 24 dogs, 4 cats, 2 mongooses, 1 jackal and 1 water buffalo were collected in 1995-1996 in Sri Lanka. Total RNA,vas extracted directly from brain suspensions and examined using a one-step reverse transcription-polymerase chain reaction (RT-PCR) for the rabies virus nucleoprotein (N) gene, Twenty-eight samples were found positive for the viru…
Emerging pathogen Cyclospora cayetanensis infection in Nepal.	Sherchand	The Southeast Asian journal of tropical medicine and public health	2001	Cylospora cayetanensis, an emerging parasitic pathogen of human is being increasingly recognized throughout the world, however the means of transmission and the possibility of a reservoir host remain an enigma. A longitudinal study on cyclosporiasis in different parts of Nepal was carried out from April, 1995 until November, 2000. Fecal specimens were collected from symptomatic and asymptomatic p…
Domestic animals of Kaki Gandaki valley in Nepal.	Fujise	Journal of Azabu University	2001	Domestic animals that breed in the Kaki Gandaki valley in Nepal were surveyed. There were mainly mini cattle, lulu, in the upstream area, a mixed breed of lulu and zebu type cattle in the downstream area from a height of 2500 m, and zebu type cattle in the downstream area. Sheep and goats were bred in the upper stream area. A lot of horses were used for riding and as packhorses. For pack animals,…
Risk of possible exposure to rabies among tourists and foreign residents in Nepal	Pandey	JOURNAL OF TRAVEL MEDICINE	2002	Background: There is little data available on the actual risk to travelers of being possibly exposed to rabies. This data would be useful in advising travelers who are considering rabies pre-exposure immunization. In addition, it is not known how many travelers are already pre-immunized when they are bitten by a possibly rabid animal. The current study was performed to determine the rate at which…
Enzyme-linked immunosorbent assay based on soluble promastigote antigen detects immunoglobulin M (IgM) and IgG antibodies in sera from cases of visceral and cutaneous leishmaniasis	Ryan	JOURNAL OF CLINICAL MICROBIOLOGY	2002	Leishmaniasis causes significant morbidity and mortality in areas where it is endemic. In areas where it is nonendemic, global travel and increased incidence of the disease in human immunodeficiency virus and intravenous-drug user populations are also causes for concern. The unavailability of rapid and reliable tests for diagnosis of the various leishmaniases makes patient management difficult. W…
Nasal worms in dogs. Detection of the nasal worm Linguatula serrata (Frohlich 1789) in 2 dogs imported from Nepal.	Egelund	Dansk Veterinartidsskrift	2002	NA
Survey of the stray dog population and the health education program on the prevention of dog bites and dog-acquired infections: A comparative study in Nepal and Okayama prefecture, Japan	Kato	ACTA MEDICA OKAYAMA	2003	We estimated the number of stray dogs in Kathmandu, Nepal, where human rabies cases still occur, and in Shimotsui, Okayama Prefecture, Japan. In Kathmandu, the stray dog density was 2,930 stray dogs/km(2), and the ratio of stray dogs to humans was 1:4.7. In Shimotsui, the density was 225 stray dogs/km(2), and the ratio was 1:5.2. Since the stray dog population in Nepal is very large, one of the m…
Improving meat inspection and control in resource-poor communities: the Nepal example	Joshi	ACTA TROPICA	2003	Meat is an important source of protein and a valuable commodity in resource-poor communities. In many developing countries, lack of appropriate slaughtering facilities and unsatisfactory slaughtering techniques are causing unnecessary losses of meat as well as invaluable by-products from animal carcasses. Slaughtering places are frequently contaminated and may not be protected against dogs, roden…
High altitude headache: Efficacy of acetaminophen vs. ibuprofen in a randomized, controlled trial	Harris	JOURNAL OF EMERGENCY MEDICINE	2003	Ibuprofen has been shown to be more effective than placebo in the treatment of high altitude headache (HAH), but nonsteroidal anti-inflammatory agents have been linked to increased incidence of gastrointestinal (GI) side effects and high-altitude pulmonary edema (HAPE). We postulated that acetaminophen, which does not share ibuprofen's theorized causal link to GI side effects or HAPE, could provi…
Inhibitory effect of Bergenia ligulata on influenza virus A	Rajbhandari	PHARMAZIE	2003	Methanol water extract from rhizomes of Bergenia ligulata, a plant used in Nepalese ethnomedicine, inhibited in vitro the replication of influenza virus in a dose dependent manner and did not show virucidal activity at effective concentration. Pretreatment of cells with B. ligulata extract was shown to be most effective to prevent cell destruction. The extract inhibited viral RNA synthesis and re…
Survey of nepalese animals for the presence of Cyclospora cayetanensis.	Chu	Abstracts of the General Meeting of the American Society for	2003	Cyclospora cayetanensis has emerged as a dominant protozoan parasite in food-borne infections. While Cyclospora oocysts have been detected worldwide, the parasite has been shown to be endemic in Nepal. The mechanism of transmission of Cyclospora remains undefined; however, there appears to be a strong link between contamination of water sources and identification of oocysts on fresh fruits and ve…
Detection of Cyclospora cayetanensis in animal fecal isolates from Nepal using an FTA filter-base polymerase chain reaction method	Chu	AMERICAN JOURNAL OF TROPICAL MEDICINE AND HYGIENE	2004	Cyclospora cayetanensis is an emerging protozoan parasite capable of causing a protracted diarrheal illness in both immunocompromised and immunocompetent individuals. Ingestion of fresh produce and water sources contaminated with mature sporulated oocysts results in acquisition of cyclosporiasis. Currently, no animal model exists for the study of this pathogenic parasite and the only confirmed re…
Buffalo rabies in Nepal	Jha	VETERINARY RECORD	2004	NA
Ancient wolf lineages in India	Sharma	PROCEEDINGS OF THE ROYAL SOCIETY B-BIOLOGICAL SCIENCES	2004	All previously obtained wolf (Canis lupus) and dog (Canis familiaris) mitochondrial (mt) DNA sequences fall within an intertwined and shallow clade (the 'wolf-dog' clade). We sequenced mtDNA of recent and historical samples from 45 wolves from throughout lowland peninsular India and 23 wolves from the Himalayas and Tibetan Plateau and compared these sequences with all available wolf and dog seque…
Population trend of semi-provisioned free-ranging temple rhesus monkey of Kathmandu Valley, Nepal	Chalise	FOLIA PRIMATOLOGICA	2004	NA
Population genetic structure, phylogenetic classification and individual identification in pet animals and useful vertebrate animals on the basis of DNA or chromosome analyses.	Murakami	Journal of Azabu University	2004	Several independent studies were carried out. The first study was the individual identification of cats and dogs using hair by mitochondrial D-loop analyses. The genetic population structure of the smelt ( Spirinchus lanceolatus), a useful fish indigenous to Japan, was also determined using mitochondrial D-loop sequence variations. Phylogenetic relationships within the Khari breed of goat in Nepa…
[Epidemiology of rabies virus and other lyssaviruses].	Arai	Nihon rinsho. Japanese journal of clinical medicine	2005	Rabies is a zoonosis that infects domestic and wild animals through close contacts with saliva from infected animals. The annual number of deaths worldwide caused by rabies is estimated approximately 55,000 by World Health Organization (WHO). There has been no indigenous rabies case in Japan since 1957; however, there was only one imported case, a traveler who was bitten by a stray dog in Nepal a…
A strategy for wealth generation through chickpea production.	Stevenson	Information Bulletin - International Crops Research Institute for the	2005	This paper describes a new technology that can lead to significant improvement in the nutrition and income of poor farmers in the Nepal terai, but is broadly applicable to most of South Asia. The technology has been shown to double chickpea yields and double the profits from growing it as a cash crop. Furthermore, it can remove most of the risks of crop failure that have reduced farmer confidence…
Impacts of replacing rice fallows with productive crops in Bangladesh, Nepal and eastern India.	Harris	Aspects of Applied Biology	2005	Large areas of rice fallows (land left fallow after the harvest of rainfed rice) were identified in Bangladesh (2.1 million hectares), Nepal (0.4 million hectares) and India (11.6 million hectares). This underscores the need to facilitate double cropping and replace rice fallows with productive crops in these areas. In Bangladesh, farmer's trials and surveys (2002) showed that a combination of ea…
Rabies antibody seroprotection rates among travelers in Nepal: "Rabies seroprotection in travelers"	Ranney	JOURNAL OF TRAVEL MEDICINE	2006	Background. Rabies preexposure immunization is recommended for international travelers who are at risk for exposure to rabid animals, especially in areas where postexposure treatment may be limited. Rabies antibody seroprotection rates among international travelers has not been previously investigated. Objective. To assess preexisting rabies seroprotection among travelers presenting to a health c…
Trypanosomiasis in domestic animals of Makwanpur district, Nepal	Maharjan	IMPACT OF EMERGING ZOONOTIC DISEASES ON ANIMAL HEALTH	2006	Trypanosomiasis is an infectious emerging hemoprotozoan parasitic disease in domestical animals of Nepal. The prevalence of disease was found in 16 of 240 (6.67%) in domestic animals of Makawanpur district, out of which 9 of 105 were (8.57%) cattle; 5 of 75 (6.67%) buffalos, and 2 of 15 (13.3%) dogs, while none of the goats and pigs acquired infection. The disease was found maximum during rainy s…
Dry season diets of sympatric ungulates in lowland Nepal: competition and facilitation in alluvial tall grasslands	Wegge	ECOLOGICAL RESEARCH	2006	Based on microhistological analyses of faecal material, we compared the early dry season diets of greater one-horned rhinoceros Rhinoceros unicornis, swamp deer Cervus duvauceli and hog deer Axis porcinus, which inhabit the same alluvial grassland habitat complex in lowland Nepal. Their diets were quite similar, both at the forage category level and within subcategories of graminoids and woody pl…
Occurrence of hydatidosis in slaughter buffaloes (Bos bubalis) and helminths in stray dogs in Kathmandu Valley, Nepal	Manandhar	BERLINER UND MUNCHENER TIERARZTLICHE WOCHENSCHRIFT	2006	The study aimed at identifying the occurrence of hydatidosis in slaughter buffaloes and helminth eggs, particularly Taenia spp. eggs in stray dogs' fecal samples in Kathmandu Valley, Nepal. The study period was from November, 2004 to April, 2005. A total of 500 buffalo carcasses in a slaughterhouse, at the riversides and individual butchers' sites were examined for the presence of hydatid cysts. …
Leishmaniasis vaccine candidates for development: A global overview	Khamesipour	INDIAN JOURNAL OF MEDICAL RESEARCH	2006	A vaccine against different forms of leishmaniasis should be feasible considering the wealth of information on genetics and biology of the parasite, clinical and experimental immunology of leishmaniasis, and the availability of vaccines that can protect experimental animals against challenge with different Leishmania species. However, there is no vaccine against any form of leishmaniasis for gene…
Leishmaniasis vaccine candidates for development: a global overview.	Ali Khamesipour	Indian Journal of Medical Research	2006	A vaccine against different forms of leishmaniasis should be feasible considering the wealth of information on genetics and biology of the parasite, clinical and experimental immunology of leishmaniasis, and the availability of vaccines that can protect experimental animals against challenge with different Leishmania species. However, there is no vaccine against any form of leishmaniasis for gene…
Environmental hazards in Nepal: Altitude illness, environmental exposures, injuries, and bites in travelers and expatriates	Boggild	JOURNAL OF TRAVEL MEDICINE	2007	Background. Adventure travel necessarily places travelers at risk of environmental hazards. We assessed the burden of "environmental" hazards among a cohort of travelers and expatriates presenting to a large travel clinic in Nepal. Methods. Data on travelers and expatriates seen at the Canadian International Water and Energy Consultants (CIWEC) clinic in Kathmandu were prospectively collected and…
Asthma symptomatics school children of Sonapur.	Pokharel	Kathmandu University medical journal (KUMJ)	2007	BACKGROUND: Bronchial asthma is one of the most common illnesses in children. Factors influencing development of asthma have not been studied in rural population. MATERIALS AND METHODS: Two thousand school-going children from three schools of Sonapur VDC, Sunsari in the surrounding of industries were screened for the presence of symptoms of asthma using a questionnaire suggested by International …
Assessing the safety of post-exposure rabies immunization in pregnancy	Arya	HUMAN VACCINES	2007	The efficacy of rabies vaccine derived from Vero cells and chick embryo cells and administered with or without immunoglobulin was remarkable among 14 pregnant women who were vaccinated following exposure to suspected, but not confirmed, rabid animals. Absence of adverse effects in the pregnant vaccinees and their young infants was remarkable. Information about the post-exposure immune response of…
Antibacterial and antiviral naphthazarins from Maharanga bicolor	Rajbhandari	PHARMAZIE	2007	Maharanga bicolor, Boraginaceae, is used in the Nepalese ethnomedicine for the treatment of several diseases. In the course of screening investigations the dichloromethane extract of the roots of Maharanga bicolor was found to inhibit the growth of gram positive bacteria. Bio-assay directed fractionation led to the isolation of five active naphthazarins, deoxyalkannin (1), alkannin (2), acetylalk…
Increased gastric-end Tidal P-CO2 gap during exercise at high altitude measured by gastric tonometry	Martin	HIGH ALTITUDE MEDICINE & BIOLOGY	2007	Using automated air gastric tonometry, the hypothesis that gastric perfusion. is reduced while exercising at high altitude was explored. This prospective observational study of 5 well acclimatized healthy volunteers was performed during a medical research expedition to Chamlang base camp (5000 m), Hongu valley, Nepal. We used gastric tonometry at rest and during graded submaximal exercise. The en…
Rk39 dipstick test as a practical solution for canine leishmaniasis diagnosis among nomadic populations	Habibzadeh	JOURNAL OF ANIMAL AND VETERINARY ADVANCES	2007	Detection of clinical manifestations of leishmaniasis in dogs is difficult and not practical for screening nomadic dogs. Our aim of study was to check out the sensitivity and specificity of a commercially available immunochromatographic dipstick rk39 test compared to Direct Agglutination Test (DAT) used in canine visceral leishmaniasis diagnosis among nomad dogs. Three hundred and twenty nomad ho…
Evidence of brucellosis in human and animal in Nepal.	Joshi	Proceedings of the 12th International Conference of the Association of	2007	Brucella organism infects all species as human, cattle, buffalo, goat, dog, pig and man (OIE, 1998). It means approximately 25.8 million human beings and around 18.84 million of the livestock are susceptible to the disease indicating potent economic looser disease. In man it cause Malta or Mediterranean fever regarding as important zoonosis rendering serous health hazard and easily transferred fr…
Study of vegetation and grazing impacts on pheasant in Pipar Reserve, Nepal.	Poudyal	Tigerpaper (Bangkok)	2007	NA
The first imported case of rabies into Japan in 36 years: A forgotten life-threatening disease	Yamamoto	JOURNAL OF TRAVEL MEDICINE	2008	A domestic case of rabies has not been reported in Japan since 1957. The last case of rabies reported in Japan was an imported case from Nepal in 1970. We recently experienced a new case imported from the Philippines, the first case in Japan in 36 years. Although Japanese people are about to forget the dangers of rabies, this case should serve as a warning to those Japanese who are planning a tri…
Gross and histopathological findings in a puppy infected with canine distemper.	Singh	Intas Polivet	2008	A 9-week-old, male puppy purchased from a kennel (Katmandu, Nepal), was taken to a veterinarian for signs of oculonasal discharge, vomiting, and diarrhoea and complete anorexia. On clinical examination, the puppy appeared febrile, mucopurulent oculo nasal discharge and cough and, was vaccinated against rabies only. The dog was treated with Amoxicillin (10 mg/kg BW I/M for 4 days, and Cephalexin, …
Endangered Asiatic wild dog (Cuon alpinus) needs conservation in eastern India	Selvan	CURRENT SCIENCE	2009	NA
Kill rates and food consumption of leopards in Bardia National Park, Nepal	Odden	ACTA THERIOLOGICA	2009	This is the first study presenting data on kill rates and food consumption among Asian leopards Panthera pardus Linnaeus, 1758. In Bardia National Park, Nepal, we found leopard kills by searching within areas with clusters of locations from radio collared leopards (2 males and 1 female with 2 cubs aged 4-9 months). We used two tracking schemes, 24-h intensive radio-tracking and daily monitoring, …
Drug Resistance in Leishmania	Bhattacharjee	Antimicrobial Drug Resistance, Vol 1: Mechanisms of Drug Resistance	2009	NA
IS SUDANESE VISCERAL LEISHMANIASIS DIFFERENT FROM VL ON THE INDIAN SUBCONTINENT?	Zijlstra	AMERICAN JOURNAL OF TROPICAL MEDICINE AND HYGIENE	2010	NA
Fingermillet harvesting and threshing in Karnataka.	Sreenatha	International Journal of Agricultural Engineering	2010	Finger millet also known as Ragi or Mandwa is the most important small millet food and fodder crop. It is extensively cultivated in Asian countries like India, Ceylon, Malaysia, China, Nepal and Japan and African countries. It is widely grown in Karnataka, Tamil Nadu, Andhra Pradesh, Orissa, Bihar, Gujarat and Maharashtra and in the hilly regions of Uttar Pradesh, Sikkim and Himachal Pradesh. Kar…
Characterization of rabies virus from a human case in Nepal	Pant	ARCHIVES OF VIROLOGY	2011	Rabies is endemic throughout most of Asia, with the majority of human cases transmitted by domestic dogs (Canis familiaris). Here, we report a case of rabies in a 12-year-old girl in the Lalitpur district of Nepal that might have been prevented by better public awareness and timely post-exposure prophylaxis. Molecular characterization of the virus showed 100% identity over a partial nucleoprotein…
Visceral Leishmaniasis in Far Western Nepal: Another Case and Concerns about a New Area of Endemicity	Schwarz	AMERICAN JOURNAL OF TROPICAL MEDICINE AND HYGIENE	2011	NA
Human Rabies in the WHO Southeast Asia Region: Forward Steps for Elimination.	Gongal	Advances in preventive medicine	2011	There are eleven Member States in the WHO southeast Asia region (Bangladesh, Bhutan, Democratic People's Republic of Korea, India, Indonesia, Maldives, Myanmar, Nepal, Sri Lanka, Thailand, Timor-Leste) of which eight are endemic for rabies. More than 1.4 billion people in the Region are at risk of rabies infection, and approximately 45% of worldwide rabies deaths occur in Asia. Dog bites account …
Molecular Characterization of Rabies Virus from Nepal	Stevens	ECOHEALTH	2011	NA
Bladder stones in a female dog and its surgical removal.	Saroj Yadav	Intas Polivet	2011	A case of urolithiasis in a 10 year old female dog and the surgical intervention is reported and discussed. The urinary calculi were removed surgically and the dog was discharged after 3 days with antibiotics and Neeri tablets for 10 days. On follow up examination the dog was healthy and had normal urination. Surgical intervention and therapeutic management as a combination therapy was found effe…
Review of Rabies Epidemiology and Control in South, South East and East Asia: Past, Present and Prospects for Elimination	Tenzin	ZOONOSES AND PUBLIC HEALTH	2012	Rabies is a serious public health problem in Asia. It causes substantial animal welfare, economic and human health impacts, with approximately 39 000 human deaths each year. Domestic dogs are the main reservoir and source of rabies in Asia. Common constraints for the control of rabies in the countries of Asia include inadequate resources; lack of political commitment to control programs; lack of …
The Vulnerable red panda Ailurus fulgens in Bhutan: distribution, conservation status and management recommendations	Dorji	ORYX	2012	The red panda Ailurus fulgens is categorized as Vulnerable on the IUCN Red List. Pressurized by an expanding human population, it is mainly threatened by habitat destruction, with,10,000 mature individuals remaining. The red panda has been studied in India, China, Nepal and, to a lesser extent, Myanmar, but no research has been published on this species in Bhutan. Here, we report on the current d…
In memoriam - Colin Kaplan (1920-2012)	Kaplan	JOURNAL OF GENERAL VIROLOGY	2012	NA
Production of tissue culture rabies vaccine for human use in Nepal	Pant	INTERNATIONAL JOURNAL OF INFECTIOUS DISEASES	2012	NA
Intramedullary pinning and use of cerclage wires for the management of diaphyseal comminuted femoral fracture in a dog.	Singh	Intas Polivet	2012	A one year old male dog sustained diaphyseal comminuted femoral fracture due to accident with car. The diagnosis was made by latero-medial radiographic evaluation. The fracture was stabilized by intramedullary pinning and use of cerclage wires. Intramedullary pin was removed after taking radiograph and clinical evidence of improvements. Animal recovered but free difficulty in jumping and climbini…
Canine fetal mummification.	Bindari	International Journal of Veterinary Science	2012	This paper reports on a case of canine fetal mummification which is very rare. A Japanese Spitz aged 5 year was brought to the clinic of Mount Everest Kennel Club. Breeding history of dog was obtained from the owner. X-ray confirmed the presence of fetus. Exploratory laparotomy was done under general anesthesia. Five mummified fetuses were observed. Ovariohysterectomy and corrective surgery were …
Prevalence of mange infestation in canines of Kathmandu Valley.	Bindari	International Journal of Veterinary Science	2012	A study on prevalence of mange infestation was conducted in canines of Kathmandu Valley. A total of 120 samples of suspected positive cases were taken from the dogs for study. Out of total the samples collected, 60 were from owned dogs (CVH - 30, Mount Everest Kennel Club - 22 and Veterinary Clinic - 8) and 60 from stray dogs (KAT - 30 and Animal Nepal - 30). The result showed that 56% and 67% sa…
Recent Emergence and Spread of an Arctic-Related Phylogenetic Lineage of Rabies Virus in Nepal	Pant	PLOS NEGLECTED TROPICAL DISEASES	2013	Rabies is a zoonotic disease that is endemic in many parts of the developing world, especially in Africa and Asia. However its epidemiology remains largely unappreciated in much of these regions, such as in Nepal, where limited information is available about the spatiotemporal dynamics of the main etiological agent, the rabies virus (RABV). In this study, we describe for the first time the phylog…
Therapeutic Options for Visceral Leishmaniasis	Monge-Maillo	DRUGS	2013	Visceral leishmaniasis (VL), also known as Kala-Azar, is a disseminated protozoal infection caused principally by Leishmania donovani and Leishmania infantum (known as Leishmania chagasi in South America). The therapeutic options for VL are diverse and depend on different factors, such as the geographical area of the infection, development of resistance to habitual treatments, HIV co-infection, m…
Common and snow leopards share prey, but not habitats: competition avoidance by large predators?	Lovari	JOURNAL OF ZOOLOGY	2013	Resource exploitation and behavioural interference underlie competition among carnivores. Competition is reduced by specializing on different prey and/or spatio-temporal separation, usually leading to different food habits. We predicted that two closely related species of large cats, the endangered snow leopard and the near-threatened common leopard, living in sympatry, would coexist through habi…
Modern vaccines/adjuvants formulation Session 6: vaccine and adjuvant formulation and production-17 May 2013, Lausanne, Switzerland	Fox	HUMAN VACCINES & IMMUNOTHERAPEUTICS	2013	The Modern Vaccines/Adjuvants Formulation meeting aims to fill a critical gap in current vaccine development efforts by bringing together formulation scientists and immunologists to emphasize the importance of rational formulation design in order to optimize vaccine and adjuvant bioactivity, safety, and manufacturability. Session 6 on Vaccine and Adjuvant Formulation and Production provided three…
Advancing Sino-Indian Cooperation to Combat Tropical Diseases	Hotez	PLOS NEGLECTED TROPICAL DISEASES	2013	NA
Dog Rabies and Its Control	Knobel	Rabies: Scientific Basis of the Disease and Its Management, 3rd Edition	2013	NA
Intramedullary pinning for surgical correction of condylar fracture in a dog.	Kshitiz Shrestha	Intas Polivet	2013	Management of a condylar fracture was done by intramedullary pinning in two years old and 25 kg weighted German shepherd with history of hit by motor vehicle. Radiograph examination revealed complete oblique condylar fracture and the management was done via open reduction method. Under general anesthesia, the femoral diaphysis and metaphysis was approached through a cranio-lateral skin incision o…
Travel-associated Illness Trends and Clusters, 2000-2010	Leder	EMERGING INFECTIOUS DISEASES	2013	Longitudinal data examining travel-associated illness patterns are lacking. To address this need and determine trends and clusters in travel-related illness, we examined data for 2000-2010, prospectively collected for 42,223 ill travelers by 18 GeoSentinel sites. The most common destinations from which ill travelers returned were sub-Saharan Africa (26%), Southeast Asia (17%), south-central Asia …
Premonsoon precipitation variability in Kumaon Himalaya, India over a perspective of similar to 300 years	Yadav	QUATERNARY INTERNATIONAL	2014	Variability in premonsoon precipitation, which has direct impact on rabi crop productivity in the Himalayan region, is not well understood in a long-term perspective, largely due to the paucity of weather data. We developed an annually resolved February-May (FM) precipitation record extending back to AD 1730 using tree-ring width data of Himalayan cedar for the first time from the Kumaon region, …
Sero-prevalence of leptospiral infection in canine population of Kathmandu valley.	Thakur	Nepalese Journal of Agricultural Sciences	2014	To determine the status of Leptospiral infection in a canine population of Kathmandu valley, a rapid diagnostic test kit was used to detect Ig antibodies in sera samples. Altogether a total of 150 sera samples were collected from the pet and stray dogs brought to the Veterinary Hospitals and Clinics with the history of fever and jaundice. Screening of all sera samples by the rapid diagnostic test…
Mutagenic effects of MH and MMS on induction of variability in broad bean ( Vicia faba L.).	Laskar	Annual Research & Review in Biology	2014	Aims: An experiment was conducted to find out the comparative response of MMS and MH on Vicia faba L. var. Nepal Selection with a view to determine the mutagen and treatment causing maximum bio-physiological and cyto-morphological variation as compared to the control for genetic improvement of crop. Study Design: Induced mutation breeding study. Place and Duration of Study: Mutation Breeding Labo…
Epidemiology of rabies in Taiwan and the capacity building of rabies diagnosis in Japan.	Inoue	Journal of Veterinary Epidemiology	2014	Taiwan has been considered canine rabies free for 52 years after the elimination of endemic dog rabies in 1961. However, three ferret-badgers ( Melogale moschata) were confirmed as rabies and reported to OIE by Taiwan government on July 17, 2013. This was the first rabies positive during rabies test under the surveillance of animals from 1999 in Taiwan. Through inter-ministerial collaboration by …
Reinstatement of Dermacentor bellulus (Acari: Ixodidae) as a Valid Species Previously Confused with D. taiwanensis and Comparison of All Parasitic Stages	Apanaskevich	JOURNAL OF MEDICAL ENTOMOLOGY	2015	Re-examination of Dermacentor taiwanensis Sugimoto, 1935 specimens in the United States National Tick Collection revealed that two morphologically distinct Dermacentor species were identified under this name. One of them corresponds to Sugimoto's description of D. taiwanensis, while another species is identical to Schulze's Dermacentor bellulus (Schulze, 1935). The latter species has not been con…
Animal-Associated Exposure to Rabies Virus among Travelers, 1997-2012	Gautret	EMERGING INFECTIOUS DISEASES	2015	Among travelers, rabies cases are rare, but animal bites are relatively common. To determine which travelers are at highest risk for rabies, we studied 2,697 travelers receiving care for animal-related exposures and requiring rabies postexposure prophylaxis at GeoSentinel clinics during 1997-2012. No specific demographic characteristics differentiated these travelers from other travelers seeking …
Habitat selection and feeding ecology of dhole (Cuon alpinus) in the Himalayas	Aryal	JOURNAL OF MAMMALOGY	2015	The Asiatic wild dog or dhole (Cuon alpinus) is an endangered, yet little-studied, species throughout its range in Nepal. We examined habitat selection and diet of the dholes by searching for dholes in the Dhorpatan Hunting Reserve (DHR), the only hunting reserve in Nepal, and developed a habitat selection model to determine their habitat preferences. We also collected anecdotal data on depredati…
Survey on street dog population in Pokhara Valley of Nepal.	Acharya	Bangladesh Journal of Veterinary Medicine	2015	A survey was carried out to determine the population of street dogs and people's opinion about their persistence in Pokhara Valley, Nepal. Information of street dog population was necessary to construct a future animal birth control (ABC) plans. For this, mark-resight survey method was used. Further, local residents were interviewed to know their opinion about the persistence of street dog popula…

## Sheet: NepJOL
Title	Author	Source	Year	Abstract
Geographic Views on the Nepali Newspaper: An Analysis on Press Prints and Universal Understanding	Panday	The Third Pole: Journal of Geography Education	2007	The profession of newspaper has been becoming more challenging in recent years. In the underdeveloped country like Nepal, media has been misused, misguided and misbehaved. The big publishing house monopolized market. They have influenced in using government facilities and diverting people's attention towards their narrow interest of political nature. In fact, newspaper can play disaster role to d…
An unusual presentation of hydatid cyst in anterior abdominal wall	Srivastava	Kathmandu University Medical Journal	2008	Hydatid disease is a parasitic infestation caused by the larval form of the cestode worm Echinococcus. The most commonly encountered form of the disease is visceral hydatid cyst caused by Echinococcus granulosus or dog tapeworm. Muscular involvement has been reported in only 3-4% cases. We are reporting this case because of its rarity, difficulty to diagnose clinically, dramatic response to medic…
Occurrence of Salmonella in drinking water samples of urban water supply system of Kathmandu	Shrestha	Botanica Orientalis: Journal of Plant Science	2009	Water-borne diseases are among the leading causes of morbidity and mortality in developing countries and around 2.2 million people die every year due to basic hygiene-related diseases, like gastroenteritis, diarrhea, typhoid and dysentery. Eighty-six water samples were randomly collected from urban water supply system of Kathmandu, and analyzed for physiochemical and microbiological parameters to…
Ethnobotany of Dioscorea L. with emphasis on food value in Chepang communities in Dhading district, central Nepal	Sharma	Botanica Orientalis: Journal of Plant Science	2009	Chepang, inhabiting the rugged terrain of Mahabharat and Churia range in central Nepal, is a group of indigenous people suffering from severe food insecurity. Their ancestors lived a semi-nomadic life up to one and half century back. To a large extent, Chepang still continue their traditional way of living, which includes collection of wild tubers (‘kandamul'), hunting and fishing. Chepangs are e…
The Pack Hunter (Dhole): Received Little Scientific Attention	Khatiwada	The Initiation	2011	The dholes received little scientific attention due to the lower charisma factor than other larger carnivores found in the same areas like Tiger and Snow Leopard. This is the first study of dholes that was conducted in Kanchenjunga Conservation Area (KCA), Nepal in 2010. Camera trapping, sign survey, interview and group discussion with local people were carried out to assess the presence/absence …
Random Amplification of Polymorphic DNA Analysis for Genetic Characterization of Two Breeds of Dogs, German Shepherd and Japanese Spitz	Joshsi	Nepal Journal of Science and Technology	2012	Random amplified polymorphic DNA (RAPD) markers were used to study genetic diversity in dog samples belonging to populations of German Shepherd and Japanese Spitz. A total of twelve samples were typed using eight RAPD primers. Out of eight primers, three primers gave result in six individuals of dogs. The phylogenetic tree constructed by the neighbor joining method based on Nei. Original measures…
Prevalence of gastrointestinal zoonotic helminths in dogs of Kathmandu, Nepal	Satyal	International Journal of Infection and Microbiology	2013	INTRODUCTION: Considering the close association of dog and human beings and increasing trend of pet rearing, it is important to know the status of zoonotic helminths of pet and stray dogs and awareness of owners about this in Kathmandu, Nepal. This study was carried out to determine the prevalence of gastrointestinal zoonotic helminth parasites in dogs and to assess the awareness about canine hel…
A Knowledge and Practices study of health hazards among animal handlers in zoological gardens	Bagaria	International Journal of Occupational Safety and Health	2014	Background- Close association with animals makes zookeepers a high risk group for suffering from various zoonotic diseases. Thus, it is important that they are able to protect themselves from these diseases and injuries through prevention awareness. Objective- To study the knowledge, attitude and practices regarding health hazards among animal handlers in zoological gardens. Materials and Methods…
Multiple recurrent cerebral hydatidosis: A case report with review of literature	Nikhita	Asian Journal of Medical Sciences	2016	Echinococcisis is an emerging zoonotic parasitic disease worldwide and is a significant health burden among developing nations. Cystic hydatidosis is more commonly found in lungs and liver but rarely cerebral involvement can occur. Multiple hydatid cysts of brain are uncommon and may be wither primary or secondary. Hydatid cyst shoud be considered as a differential diagnosis for cystic lesions of…

## Sheet: WHO-IRIS
Title	Author	Source	Year	Abstract
Assignment report on prevention of rabies in Nepal, 30 November 1972 - 28 February 1973	Veeraraghavan	http://apps.who.int/iris/handle/10665/154032	1973	NA
Assignment report on development of a rabies control programme, including production and quality control of rabies vaccine, Nepal, 2 November - 1 December 1984	Bahmanyar	http://apps.who.int/iris/handle/10665/162972	1985	NA
Assignment report on control of human and canine rabies, Nepal: study of dog ecology in the Kathmandu Valley, 18 November - 17 December 1985	Budde	http://apps.who.int/iris/handle/10665/163599	1986	NA
Assignment report on rabies control and eradication in Nepal, 2 June - 1 July 1986	Nanavati	http://apps.who.int/iris/handle/10665/163598	1986	NA
Assignment report on development of human and canine rabies control programme, Nepal, 23 December 1985 - 13 January 1986	Sehgal	http://apps.who.int/iris/handle/10665/163600	1986	NA
Assignment report on intercountry practical training course in dog population management, Kathmandu, Nepal, 27-31 October 1986	Wandeler	http://apps.who.int/iris/handle/10665/163803	1987	NA
Accessibility of dog populations for rabies control in Kathmandu Valley, Nepal / K. Bögel & D. D. Joshi	Bogel	Bulletin of the World Health Organization	1990	The accessibility of dogs in urban areas of Kathmandu valley was measured using the following approaches: determination of the proportion of dogs that bore signs of having been the objects of religious worship and other signs of household association, supplemented by information obtained by interviewing people in the neighbourhood; and the vaccination coverage attained in a rabies control campaig…
Dog population studies related to a vaccination campaign against rabies in Lalitpur City, Nepal, May 31 to July 05, 1989 : report to the World Health Organization, Geneva / given by Andreas Kappeler and Alexander I. Wandeler	Kappeler	http://apps.who.int/iris/handle/10665/69473	1991	NA

## Sheet: UNIQUE
Title	Author	Source	Year	Abstract	Rabies	Nepal	ELIGIBLE	ABSTRACT2	FULL	INCLUDE	INFO
Gnathostomiasis in a dog.	Varma	Current Science	1955	NA	0	0	0			0
Identity, distribution, and hosts of Haemaphysalis (Rhipi-stoma) indica Warburton (resurrected) (Ixodoidea : Ixodidae), a carnivore parasite of the Indian subregion.	HOOGSTRAAL	Journal of Parasitology	1970	The following is based partly on the author's abstract. Haemaphysalis indica Warb., which was originally described as a variety of H. leachii (Aud.) and is stated to have been frequently misidentified, is redescribed from males, females, nymphs and larvae taken between sea level and 1, 500 ft in the east of West Pakistan, India, Ceylon and southern Nepal and is raised to specific rank. The hosts …	0	0	0			0
Ixodes (Ixodes) nuttallianus Schulze: redescription of female, description of male, and hosts and ecology in Nepal (Acarina: Ixodidae).	Clifford	Journal of medical entomology	1971	NA	0	1	0			0
New records of Mallophaga from Nepalese mammals.	Emerson	Journal of medical entomology	1971	NA	0	1	0			0
Haemaphysalis (Alloceraea) aponommoides Warburton (Ixodoidea: Ixodidae), description of immature stages, hosts, distribution, and ecology in India, Nepal, Sikkim, and China.	Hoogstraal	J Parasitol	1971	NA	0	1	0			0
CLINICAL AND EPIDEMIOLOGICAL OBSERVATIONS ON AN OUTBREAK OF PLAGUE IN NEPAL	LAFORCE	BULLETIN OF THE WORLD HEALTH ORGANIZATION	1971	NA	0	1	0			0
[Buffaloes in Nepal.].	Leue	Tierarztliche Umschau	1971	The wild buffalo of Nepal. A relative of the indian Bubalis bubalis is a ploughing animal and a source of dung and milk (av. yield: 400-500 kg milk per lactation). The total population is about 3.3 million. The husbandry methods employed in the upkeep of these animals are briefly described and the more important diseases discussed. Fairly common puerperal complications are uterine torsion and pro…	1	1	1	1	0	1	Animal rabies, historical reference
IXODES (PARTIPALPIGER) OVATUS NEUMANN, SUBGENUS NOV - IDENTITY, HOSTS,ECOLOGY, AND DISTRIBUTION (IXODOIDEA-IXODIDAE)	HOOGSTRA.H	JOURNAL OF MEDICAL ENTOMOLOGY	1973	NA	0	0	0			0
Assignment report on prevention of rabies in Nepal, 30 November 1972 - 28 February 1973	Veeraraghavan	http://apps.who.int/iris/handle/10665/154032	1973	NA	1	1	1	0	1	1
Susceptibility of a yak to influenza A viruses and presence of H3N2 antibodies in animals in Nepal and India.	Graves	Bulletin of the World Health Organization	1974	Naturally acquired antibody to H3N2 human influenza antigens was found in a yak-zebu crossbred in Nepal. Serial inoculation of a yak, negative for antibody, produced a response to A/Hong Kong/1/68 (H3N2), A/England/42/72 (H3N2), and A/Prague/1/56 (Heq1 Neq1) influenzavirus strains. Single radial diffusion tests showed that cattle and goats in West Bengal, India, and water buffaloes and cattle in …	0	1	0			0
On the cestode Taenia hydatigena from the wild dog in Nepal.	Sawada	Japanese Journal of Tropical Medicine and Hygiene	1975	Taenia hydatigena was found in the small intestine of a wild dog caught in Katmandu, Nepal. This is the first report of this cestode from the wild dog in Nepal.	0	1	0			0
Domestic animals of Nepal.	Epstein	Domestic animals of Nepal.	1977	Professor Epstein is well known as a writer of books on breeds of livestock; his books on Africa and China are classics. It is, therefore, a pleasure to welcome another of his contributions to the inventory of the animal genetic resources of the developing world. As Dr Boerma, lately Director-General of FAO, says in his foreword, Nepal may seem a small country compared with its giant neighbours, …	0	1	0			0
A study of the weed problem at Rampur, Chitwan, Nepal.	Gupta	Journal of the Institute of Agriculture and Animal Science	1977	A weed survey was conducted during 1976-1977 at Rampur (Chitwan) in the major crops of the area and in some non-crop situations. Sixty-three major weed species were found to infest these situations. Of these 15 belonged to the Gramineae and 15 to the Cyperaceae. Twelve perennial weed species were found in the weed flora. Of the major crops of Rampur, paddy and maize were most infested with weeds.…	0	1	0			0
Records of Hippoboscidae (Diptera) from Nepal.	Mogi	Japanese Journal of Sanitary Zoology	1977	NA	0	1	0			0
Response of wheat, rape and potato to weeding at Rampur, Chitwan, Nepal.	Shivakoti	IAAS [Institute of Agriculture and Animal Science] Journal	1977	Three field trials were conducted in rabi, one each in wheat, Toria rape [Brassica campestris var. Toria] and potato to study their response to weed-free conditions. It was found that under Rampur (Nepal) conditions rabi crops were infested with only a single flush of weeds. When these weeds were removed manually, 45 days after sowing in the case of wheat and 32 days in the case of rape, signific…	0	1	0			0
TOXOCARA GRANULOMA OF THE RETINA	UPADHYAY	JAPANESE JOURNAL OF OPHTHALMOLOGY	1980	NA	0	0	0			0
Human rabies in Kathmandu, Nepal.	Joshi	The Journal of communicable diseases	1981	NA	1	1	1	0	0	0
Control of gid in goats.	Shah	Bulletin of Veterinary Science & Animal Husbandry, Nepal	1981	NA	0	1	0			0
A killer disease in dogs [in Nepal, probably canine parvovirus infection].	Singh	Bulletin of Veterinary Science & Animal Husbandry, Nepal	1981	NA	0	1	0			0
Trypanosomiasis in a dog imported in The Netherlands.	Hellebrekers	The Veterinary quarterly	1982	A case-report is presented of a Trypanosoma evansi infection in a dog imported from Nepal. The clinical symptoms included fever, anorexia, and weight loss. Diagnosis was made through morphologic study of blood smears from the patient.	0	1	0			0
An analysis of the husbandry system in the Himalayan foothills - the example of Salme in Nepal.	Berthet-Bondet	Analyse du systeme d'elevage dans les collines prehimalayennes - le cas	1983	Only a small part of this thesis is devoted to the breeding and performance of livestock in the Salme area. There are descriptions (taken mainly from the literature) of the cattle, buffaloes, sheep, goats, pigs, dogs and fowls, illustrated by photographs, and brief consideration of management practices. Jerseys have been introduced for crossing with the local cattle. For 25, 17, 4 and 4 lactation…	0	1	0			0
Grain and straw yields of wheat, economics of the system and nutrient status of the soil as influenced by residual fertility of clusterbean (guar) and direct fertilization of wheat.	Regmi	Nepalese Journal of Agriculture	1984	At the Indian Agricultural Research Institute, New Delhi in the kharif [monsoon] and rabi [winter] seasons of 1982-83, the responses of Cyamopsis tetragonoloba grown for fodder and seed to 0 or 50 kg P 2O 5/ha, of a subsequent wheat crop to the residual effect of C. tetragonoloba and of wheat to 0, 60 or 120 kg N and 0 or 50 kg P 2O 5/ha were recorded. Crop response to P occurred in soils with lo…	0	1	0			0
RABIES IN SOUTHEAST ASIA	BAHNEMANN H G	KUWERT, E. ET AL. (ED.). RABIES IN THE TROPICS; INTERNATIONAL	1985	NA	1	1	1	0	0	0
Nepal.	Lamichhane	Veterinary viral diseases, their significance in South-East Asia and the	1985	In 1983-84 the following strains of foot and mouth disease virus were isolated in Nepal: type O (8 isolates), type A (7 isolates) and type Asia-1 (2 isolates). Rabies is an important public health and veterinary problem, the sylvatic source is the most important but stray dogs are the main carriers. In 1983-84, 10 of 29 suspect cases were positive for rabies. Newcastle disease caused 79 confirmed…	1	1	1	1	0	1	Animal rabies, historical reference
Assignment report on development of a rabies control programme, including production and quality control of rabies vaccine, Nepal, 2 November - 1 December 1984	Bahmanyar	http://apps.who.int/iris/handle/10665/162972	1985	NA	1	1	1	0	1	1
Assignment report on control of human and canine rabies, Nepal: study of dog ecology in the Kathmandu Valley, 18 November - 17 December 1985	Budde	http://apps.who.int/iris/handle/10665/163599	1986	NA	1	1	1	0	1	1
Assignment report on rabies control and eradication in Nepal, 2 June - 1 July 1986	Nanavati	http://apps.who.int/iris/handle/10665/163598	1986	NA	1	1	1	0	1	1
Assignment report on development of human and canine rabies control programme, Nepal, 23 December 1985 - 13 January 1986	Sehgal	http://apps.who.int/iris/handle/10665/163600	1986	NA	1	1	1	0	1	1
Assignment report on intercountry practical training course in dog population management, Kathmandu, Nepal, 27-31 October 1986	Wandeler	http://apps.who.int/iris/handle/10665/163803	1987	NA	1	1	1	0	1	1
Role of lesser developed nations in rabies research.	Joshi	Reviews of infectious diseases	1988	The contributions of lesser developed nations to rabies research can be significant in several areas. The type of health system that supports complex veterinary-public health programs, the operational research that is required in these countries, the follow-up epidemiologic surveillance, and the involvement in technology transfer concerning new rabies vaccines and rapid and simple diagnostic proc…	1	1	1	1	1	1	Rabies control programme, historical reference
SCREENING OF CRUDE DRUGS USED IN NEPAL FOR NEMATOCIDAL ACTIVITY ON THE LARVA OF TOXOCARA-CANIS	KIUCHI F	Shoyakugaku Zasshi	1989	Hot water extracts of 160 crude drugs used in Nepal were tested for their in vitro nematocidal activity on the second-stage larva of the dog roundworm, Toxocara canis, which is a common pathogenic parasite in larva migrans. Twenty-two of them showed a potent nematocidal activity (RM = 0, after 24 h incubation), and the activities of "Bojho" (rhizome of Acorus calamus L.) and "Pan ko Jara" (rhizom…	0	1	0			0
Accessibility of dog populations for rabies control in Kathmandu valley, Nepal.	Bogel	Bulletin of the World Health Organization	1990	The accessibility of dogs in urban areas of Kathmandu valley was measured using the following approaches: determination of the proportion of dogs that bore signs of having been the objects of religious worship and other signs of household association, supplemented by information obtained by interviewing people in the neighbourhood; and the vaccination coverage attained in a rabies control campaig…	1	1	1	1	1	1	Rabies control programme, historical reference
[Imported infestations of nasopharyngeal parasites in dogs].	Gothe	Tierarztliche Praxis	1991	In this paper infestations of the nasal cavity with Myxobdella annandalei in a dog after a sojourn in Nepal and with Linguatula serrata in 2 stray dogs from Turkey, which were imported to Germany, are described.	0	1	0			0
Organisation of veterinary public health in the south Asia region.	Joshi	Revue scientifique et technique (International Office of Epizootics)	1991	In the South Asia region vast human populations are exposed daily and with considerable intensity to close contact with vast animal populations and their excreta. There is no veterinary public health unit in the World Health Organisation (WHO) South-East Asia Regional Office (SEARO) in New Delhi (India), the Western Pacific Regional Office (WPRO) in Manila (Philippines) or the Eastern Mediterrane…	1	1	1	1	1	1	Rabies control, organizations
RABIES IMMUNOPROPHYLAXIS STRATEGY IN TRAVELERS	SHLIM	JOURNAL OF WILDERNESS MEDICINE	1991	We present data from a two-year study of foreign travelers with possible exposure to rabies virus who presented to the only clinics in Nepal that provided modern rabies vaccine. Of 395 000 foreign tourists and residents who visited Nepal during the study period, 62 required post-exposure rabies immunoprophylaxis. Dog bites accounted for 76% of the exposures, while 20% were due to monkey bites. Si…	1	1	1	1	1	1	Epidemiology, monkey bites in tourists
CHEESE, TOURISTS, AND RED PANDAS IN THE NEPAL HIMALAYAS	YONZON	CONSERVATION BIOLOGY	1991	Langtang National Park in the Nepal Himalayas provides resources for about 30,000 people living in and around the park. The park is the site of two cheese factories that produce 14,000 kg of cheese per year for marketing in Kathmandu. The factories collect about 140,000 liters of milk annually and use well over 100,000 kg of fuel wood to process the milk into cheese. Loans and one-year advance pa…	0	1	0			0
CONSERVATION OF THE RED PANDA AILURUS-FULGENS	YONZON	BIOLOGICAL CONSERVATION	1991	The red panda Ailurus fulgens is a species of special interest because it is taxonomically distinct (probably a monotypic subfamily) and may be threatened with extinction, at least in the Himalayan portion of its range. During a two-year study in Langtang National Park, Nepal, red pandas were habitat specialists that preferred fir-jhapra bamboo forests between 2800 and 3900 m (92% of radio locati…	0	1	0			0
Dog population studies related to a vaccination campaign against rabies in Lalitpur City, Nepal, May 31 to July 05, 1989 : report to the World Health Organization, Geneva / given by Andreas Kappeler and Alexander I. Wandeler	Kappeler	http://apps.who.int/iris/handle/10665/69473	1991	NA	1	1	1	0	1	1
Genetic diversity in lablab bean	Birari	Journal of Maharashtra Agricultural Universities	1992	The genetic diversity in a population of 36 genetic stocks of Lablab bean, Lablab purpureus (L.) Sweet, from diverse geographic sources were grouped in 7 constellations utilizing 15 quantitative characters by D2 statistic and canonical test. CO 5 and No.692 were highly divergent from all others for their yields, Habbal 3 for earliness, CO 1 for high seed number and 269, EC 18176 and Golangaon loc…	0	0	0			0
Scientific and Technical Review International Office of Epizootics, Vol. 11. No. 3	International Office Of Epizootics	[Scientific and Technical Review International Office of Epizootics]	1992	This volume contains 26 papers examining various topics in veterinary medicine. The series focuses on infectious diseases, international epidemiology, and specific control and treatment regimes in agricultural animals. Some of the countries from which research is reported include Australia, Cameroon, Nepal, Egypt, and Argentina. Some of the infectious diseases discussed include foot and mouth dis…	1	1	0	1	0	0	Not a journal article
Diseases of cattle and buffaloes in the Koshi hills of Nepal. A retrospective study.	Thakuri	Veterinary Review (Kathmandu)	1992	Records of 91 562 clinical cases (75 412 cattle and 16 150 buffaloes) seen in 1985-1990 at the veterinary hospitals of 4 Koshi hill districts showed that the major clinical conditions were: parasitic diseases (37 521 cattle, 11 766 buffaloes), infectious diseases (22 741 and 469, respectively), and general debility (4543 and 1327, respectively). Of the 23 029 cases of helminth parasites recorded …	1	1	1	1	0	1	Animal rabies, historical reference
Clinical tropical medicine.	Cowan	Clinical tropical medicine.	1993	The Royal Army Medical Corps (RAMC) has a considerable tradition in producing texts on "tropical medicine". An early contributor from the British Army was Sir John Pringle whose monumental work "Observations on the diseases of the army" first published in 1752 went to 7 editions; more recent tomes include: L. Rogers and J.W.D. Megaw (1930), and W.H. Hargreaves and R.J.G. Morrison (1965). Tropical…	1	1	0	1	0	0	Book
Epidemiology of rabies in Kathmandu Valley, 1989/90-91/92.	Gongal	JNMA, Journal of the Nepal Medical Association	1993	The Kathmandu valley in Nepal has an area of only 899 km in which 1.1 million people live with their dogs, whose domestic numbers alone are estimated to be about 30 000. These conditions provide the classic ecosystem for the generation and maintenance of a canine rabies cycle. Overpopulation and uncontrolled urbanization produce vast quantities of human food waste. Owned and stray dogs, as well a…	1	1	1	1	0	1	Epidemiology, garbage policy
Examination of taeniid metacestodes from the Far East, with the description of Taenai kotlani sp. n. (Cestoda: Taeniidae)	Murai	Parasitologia Hungarica	1993	The metacestodes of Taenia kotlani sp. n. from Mongolian ibex (Capra ibex sibirica Pallas, 1776), and the metacestodes of Taenia parenchymatosa Pushmenkov, 1945 from the lungs of Siberian roe deer (Capreolus pygargus (Pallas, 1771)), which is a new intermediate host, are described. As comparative material adult and larval Taenia hydatigena Pallas, 1766 from Hungary were studied. For specific diff…	0	1	0			0
The ecology of dogs and canine rabies: a selective review.	Wandeler	Revue scientifique et technique (International Office of Epizootics)	1993	Although dogs are the most widespread and abundant of all carnivores, the role of the dog in human cultures and its impact on the environment have rarely been studied. These subjects are reviewed in the context of canine rabies. To understand the epizootiology of canine rabies, the ecology and population biology of the dog must be considered. Information on dog populations (in relation to differe…	1	1	1	1	1	1	Rabies control programme, historical reference
Echinococcus granulosus infections in the dogs of Kathmandu, Nepal.	Baronet	Annals of tropical medicine and parasitology	1994	The prevalence, incidence and risk factors of infection by Echinococcus granulosus were studied in the domestic and street dogs of Kathmandu, Nepal. Using an ELISA coproantigen test as a screening method, the highest prevalence (5/88 = 5.7%) was seen in domestic dogs from an area of the city used for slaughtering livestock. A prevalence of 1.8% (3/171) was found in domestic dogs seen at eight vet…	0	1	0			0
Epidemiology of echinococcosis in Nepal.	Joshi	The Southeast Asian journal of tropical medicine and public health	1997	Echinococcosis and hydatidosis is a parasitic zoonotic disease of human and animals. This disease has created public health and environment problems in all urban areas of Nepal. Based on the three year study (1993-1995) it has been revealed that the epidemiological cycle (indigenous) of Echinococcus granulosus parasite is dog-pig-dog cycle and human acquire infection accidentally through infected…	0	1	0			0
Human rabies--New Hampshire, 1996.	NA	MMWR. Morbidity and mortality weekly report	1997	On August 20, 1996, a 32-year-old resident of New Hampshire died in a Massachusetts hospital from an illness characterized by rapid neurologic deterioration. Rabies had been clinically suspected on the date of her transfer from a New Hampshire hospital (August 14) and was confirmed by CDC on August 17. This report summarizes the investigation of this case by the state health departments of New Ha…	1	1	1	1	1	1	Human rabies, traveler
Mange infestation and its treatment in Sinhal goats of migratory flocks of Lamjung and Kaski districts of western Nepal.	Ghimire	Veterinary Review (Kathmandu)	1998	Outbreaks of mange were recorded in some of the migratory flocks of Lamjung and Kaski districts of Nepal during 1990-91. These outbreaks, in some of the flocks, were investigated to elucidate the nature of the disease. The morbidity and case fatality rate of mange among the goats inspected in 3 village flocks (167, 312, 682 goats inspected) were 49.4, 14.9 and 27.9, and 62.2, 32.7 and 40.8, respe…	0	1	0			0
International travel with pets. Part II. The threat of foreign pathogens	Hendrix	COMPENDIUM ON CONTINUING EDUCATION FOR THE PRACTICING VETERINARIAN	1998	This article reviews an assortment of foreign pathogens that have been introduced into the United States (or other countries) by the pets of unwitting owners. These pathogens may be rickettsiae, protozoans, schistosomes, dipteran fly larvae, filarial parasites, ticks, fleas, or leeches. Each pathogen is discussed according to geographic distribution, clinical presentation, diagnosis, treatment, a…	0	1	0
Short report: An imported case of cystic echinococcosis in Japan diagnosed by imaging and serology with confirmation of Echinococcus granulosus-specific DNA sequences.	Ito	The American journal of tropical medicine and hygiene	1998	We report one case of cystic echinococcosis (CE) in Japan in a native of Nepal. Ultrasonography and computed tomography scan of the liver revealed unique cystic lesions with or without daughter cysts of Echinococcus granulosus. Immunoblot analysis using crude antigens of E. multilocularis and cyst fluid of E. granulosus, without reference to these image analyses, strongly suggested this was a cas…	0	1	0			0
Sandflies species distribution, biting activities and feeding habits in kala-azar affected areas of southern Nepal.	Joshi	JNMA, Journal of the Nepal Medical Association	1998	An entomological study of visceral leishmaniasis was conducted in rural villages in southern Nepal to determine the distribution of sandfly fauna, their bionomics and their feeding host preferences. The species composition of collected sandflies was Phlebotomus papatasi, P. argentipes and Sergentomyia babu. P. papatasi was the predominant species in all of the collection sites. It was found that …	0	1	0			0
Taxonomic study of the genus Ctenocephalides Stiles & Collins, 1930 (Insecta : Siphonaptera : Pulicidae) by using aedeagus characters	Menier	JOURNAL OF MEDICAL ENTOMOLOGY	1998	To define more accurately the taxonomic position of the species of Ctenocephalides Stiles & Collins, 1930 (Siphonaptera), a morphological study of the aedeagus vias conducted, on all taxa of this genus. Based on some phallosome structures (hamulus, lobes, tubus interior), an identification key is constructed to complement the existing taxonomic criteria. C. orientis and C. damarensis are confirme…	0	0	0			0
Case records of the Massachusetts General Hospital. Weekly clinicopathological exercises. Case 21-1998. A 32-year-old woman with pharyngeal spasms and paresthesias after a dog bite.	NA	The New England journal of medicine	1998	NA	1	1	1	0	1	1	Human rabies, traveler
Attempts to establish experimental Cyclospora cayetanensis infection in laboratory animals.	Eberhard	The Journal of parasitology	2000	Attempts were made to develop an animal model for Cyclospora cayetanensis to identify a practical laboratory host for studying human cyclosporiasis. Oocysts collected from stool of infected humans in the United States, Haiti, Guatemala, Peru, and Nepal were held in potassium dichromate solution to allow development of sporozoites. The following animal types were inoculated: 9 strains of mice, inc…	0	1	0			0
Oral rabies vaccine - a possible promise for canine rabies control in Nepal.	Gongol	Veterinary Review (Kathmandu)	2000	NA	1	1	1	0	0	0
Epidemiology of rabies and echinococcosis in Nepal.	Joshi	Proceedings of the 9th Symposium of the International Society for	2000	NA	1	1	1	0	1	1	Epidemiology, dog population
Genetic variability and heritability studies and scope for improvement in chickpea	Nimbalkar	Journal of Maharashtra Agricultural Universities	2000	NA	0	0	0			0
Characterization of Sri Lanka rabies virus isolates using nucleotide sequence analysis of nucleoprotein gene.	Arai	Acta virologica	2001	Thirty-four suspected rabid brain samples from 2 humans, 24 dogs, 4 cats, 2 mongooses, I jackal and I water buffalo were collected in 1995-1996 in Sri Lanka. Total RNA was extracted directly from brain suspensions and examined using a one-step reverse transcription-polymerase chain reaction (RT-PCR) for the rabies virus nucleoprotein (N) gene. Twenty-eight samples were found positive for the viru…	1	0	0			0
Domestic animals of Kaki Gandaki valley in Nepal.	Fujise	Journal of Azabu University	2001	Domestic animals that breed in the Kaki Gandaki valley in Nepal were surveyed. There were mainly mini cattle, lulu, in the upstream area, a mixed breed of lulu and zebu type cattle in the downstream area from a height of 2500 m, and zebu type cattle in the downstream area. Sheep and goats were bred in the upper stream area. A lot of horses were used for riding and as packhorses. For pack animals,…	0	1	0			0
Participatory evaluation by farmers of on-farm seed priming in wheat in India, Nepal and Pakistan	Harris	EXPERIMENTAL AGRICULTURE	2001	The mean time for 50% germination at 20 degrees C of 12 Indian wheat (Triticum aestivum) cultivars was nearly halved, from 51 h to 27 h, by soaking seed in water for 8 h prior to sowing. A delay of 24 h without further soaking, intended to simulate postponement of sowing, reduced the time saved by priming to 16%. Priming had no effect on final germination percentage. These results were used in th…	0	1	0			0
Risk factors associated with bronchial asthma in school going children of rural Haryana.	Pokharel	Indian journal of pediatrics	2001	Bronchial asthma is one of the most common illnesses in children. Factors influencing development of asthma have not been studied in rural population. 2000 school going children from five schools of Chhainsa and Dayalpur Primary Health Centre area in Ballabgarh Block of Haryana state were screened for presence of symptoms of asthma using a questionnaire suggested by International Study of Asthma …	0	0	0			0
Screening of Nepalese medicinal plants for antiviral activity.	Rajbhandari	Journal of ethnopharmacology	2001	In an ethnopharmacological screening, plants used in Nepalese traditional medicine were evaluated for antiviral activity. Methanolic and methanolic-aqueous extracts derived of 23 species were assayed in two in vitro viral systems, influenza virus/MDCK cells and herpes simplex virus/Vero cells. Two species, Bergenia ligulata and Nerium indicum showed the highest antiinfluenzaviral activity with 50…	0	1	0			0
Emerging pathogen Cyclospora cayetanensis infection in Nepal.	Sherchand	The Southeast Asian journal of tropical medicine and public health	2001	Cylospora cayetanensis, an emerging parasitic pathogen of human is being increasingly recognized throughout the world, however the means of transmission and the possibility of a reservoir host remain an enigma. A longitudinal study on cyclosporiasis in different parts of Nepal was carried out from April, 1995 until November, 2000. Fecal specimens were collected from symptomatic and asymptomatic p…	0	1	0			0
Nasal worms in dogs. Detection of the nasal worm Linguatula serrata (Frohlich 1789) in 2 dogs imported from Nepal.	Egelund	Dansk Veterinartidsskrift	2002	NA	0	1	0			0
Risk of possible exposure to rabies among tourists and foreign residents in Nepal.	Pandey	Journal of travel medicine	2002	BACKGROUND: There is little data available on the actual risk to travelers of being possibly exposed to rabies. This data would be useful in advising travelers who are considering rabies pre-exposure immunization. In addition, it is not known how many travelers are already pre-immunized when they are bitten by a possibly rabid animal. The current study was performed to determine the rate at which…	1	1	1	1	1	1	Epidemiology, monkey bites in tourists
Enzyme-linked immunosorbent assay based on soluble promastigote antigen detects immunoglobulin M (IgM) and IgG antibodies in sera from cases of visceral and cutaneous leishmaniasis.	Ryan	Journal of clinical microbiology	2002	Leishmaniasis causes significant morbidity and mortality in areas where it is endemic. In areas where it is nonendemic, global travel and increased incidence of the disease in human immunodeficiency virus and intravenous-drug user populations are also causes for concern. The unavailability of rapid and reliable tests for diagnosis of the various leishmaniases makes patient management difficult. W…	0	1	0			0
Survey of nepalese animals for the presence of Cyclospora cayetanensis.	Chu	Abstracts of the General Meeting of the American Society for	2003	Cyclospora cayetanensis has emerged as a dominant protozoan parasite in food-borne infections. While Cyclospora oocysts have been detected worldwide, the parasite has been shown to be endemic in Nepal. The mechanism of transmission of Cyclospora remains undefined; however, there appears to be a strong link between contamination of water sources and identification of oocysts on fresh fruits and ve…	0	1	0			0
High altitude headache: Efficacy of acetaminophen vs. ibuprofen in a randomized, controlled trial	Harris	JOURNAL OF EMERGENCY MEDICINE	2003	Ibuprofen has been shown to be more effective than placebo in the treatment of high altitude headache (HAH), but nonsteroidal anti-inflammatory agents have been linked to increased incidence of gastrointestinal (GI) side effects and high-altitude pulmonary edema (HAPE). We postulated that acetaminophen, which does not share ibuprofen's theorized causal link to GI side effects or HAPE, could provi…	0	1	0			0
Improving meat inspection and control in resource-poor communities: the Nepal example.	Joshi	Acta tropica	2003	Meat is an important source of protein and a valuable commodity in resource-poor communities. In many developing countries, lack of appropriate slaughtering facilities and unsatisfactory slaughtering techniques are causing unnecessary losses of meat as well as invaluable by-products from animal carcasses. Slaughtering places are frequently contaminated and may not be protected against dogs, roden…	0	1	0			0
Survey of the stray dog population and the health education program on the prevention of dog bites and dog-acquired infections: a comparative study in Nepal and Okayama Prefecture, Japan.	Kato	Acta medica Okayama	2003	We estimated the number of stray dogs in Kathmandu, Nepal, where human rabies cases still occur, and in Shimotsui, Okayama Prefecture, Japan. In Kathmandu, the stray dog density was 2,930 stray dogs/km2, and the ratio of stray dogs to humans was 1:4.7. In Shimotsui, the density was 225 stray dogs/km2, and the ratio was 1:5.2. Since the stray dog population in Nepal is very large, one of the measu…	1	1	1	1	1	1	Epidemiology, dog population
A study on 'Vermiform Appendix'--a caecal appendage in common laboratory mammals.	Malla	Kathmandu University medical journal (KUMJ)	2003	The vermiform appendix, a small structure without any known function in human being has been regarded as a vestigial remnant of a more developed distal caecum in man's herbivorous ancestors. A detailed study of the morphological and histological changes in the appendix and the caecum of different mammals with varying dietary habits revealed a distinctly well-defined vermiform appendix in rabbit o…	0	0	0			0
Inhibitory effect of Bergenia ligulata on influenza virus A.	Rajbhandari	Die Pharmazie	2003	Methanol water extract from rhizomes of Bergenia ligulata, a plant used in Nepalese ethnomedicine, inhibited in vitro the replication of influenza virus in a dose dependent manner and did not show virucidal activity at effective concentration. Pretreatment of cells with B. ligulata extract was shown to be most effective to prevent cell destruction. The extract inhibited viral RNA synthesis and re…	0	1	0			0
Population trend of semi-provisioned free-ranging temple rhesus monkey of Kathmandu Valley, Nepal	Chalise	FOLIA PRIMATOLOGICA	2004	NA	0	1	0			0
Detection of Cyclospora cayetanensis in animal fecal isolates from Nepal using an FTA filter-base polymerase chain reaction method.	Chu	The American journal of tropical medicine and hygiene	2004	Cyclospora cayetanensis is an emerging protozoan parasite capable of causing a protracted diarrheal illness in both immunocompromised and immunocompetent individuals. Ingestion of fresh produce and water sources contaminated with mature sporulated oocysts results in acquisition of cyclosporiasis. Currently, no animal model exists for the study of this pathogenic parasite and the only confirmed re…	0	1	0			0
Buffalo rabies in Nepal.	Jha	The Veterinary record	2004	NA	1	1	1	0	0	0
Population genetic structure, phylogenetic classification and individual identification in pet animals and useful vertebrate animals on the basis of DNA or chromosome analyses.	Murakami	Journal of Azabu University	2004	Several independent studies were carried out. The first study was the individual identification of cats and dogs using hair by mitochondrial D-loop analyses. The genetic population structure of the smelt ( Spirinchus lanceolatus), a useful fish indigenous to Japan, was also determined using mitochondrial D-loop sequence variations. Phylogenetic relationships within the Khari breed of goat in Nepa…	0	1	0			0
Ancient wolf lineages in India.	Sharma	Proceedings. Biological sciences / The Royal Society	2004	All previously obtained wolf (Canis lupus) and dog (Canis familiaris) mitochondrial (mt) DNA sequences fall within an intertwined and shallow clade (the 'wolf-dog' clade). We sequenced mtDNA of recent and historical samples from 45 wolves from throughout lowland peninsular India and 23 wolves from the Himalayas and Tibetan Plateau and compared these sequences with all available wolf and dog seque…	0	1	0			0
[Epidemiology of rabies virus and other lyssaviruses].	Arai	Nihon rinsho. Japanese journal of clinical medicine	2005	Rabies is a zoonosis that infects domestic and wild animals through close contacts with saliva from infected animals. The annual number of deaths worldwide caused by rabies is estimated approximately 55,000 by World Health Organization (WHO). There has been no indigenous rabies case in Japan since 1957; however, there was only one imported case, a traveler who was bitten by a stray dog in Nepal a…	1	1	1	1	0	1	Human rabies, traveler
Impacts of replacing rice fallows with productive crops in Bangladesh, Nepal and eastern India.	Harris	Aspects of Applied Biology	2005	Large areas of rice fallows (land left fallow after the harvest of rainfed rice) were identified in Bangladesh (2.1 million hectares), Nepal (0.4 million hectares) and India (11.6 million hectares). This underscores the need to facilitate double cropping and replace rice fallows with productive crops in these areas. In Bangladesh, farmer's trials and surveys (2002) showed that a combination of ea…	0	1	0			0
A strategy for wealth generation through chickpea production.	Stevenson	Information Bulletin - International Crops Research Institute for the	2005	This paper describes a new technology that can lead to significant improvement in the nutrition and income of poor farmers in the Nepal terai, but is broadly applicable to most of South Asia. The technology has been shown to double chickpea yields and double the profits from growing it as a cash crop. Furthermore, it can remove most of the risks of crop failure that have reduced farmer confidence…	0	1	0			0
Leishmaniasis vaccine candidates for development: a global overview.	Ali Khamesipour	Indian Journal of Medical Research	2006	A vaccine against different forms of leishmaniasis should be feasible considering the wealth of information on genetics and biology of the parasite, clinical and experimental immunology of leishmaniasis, and the availability of vaccines that can protect experimental animals against challenge with different Leishmania species. However, there is no vaccine against any form of leishmaniasis for gene…	0	1	0			0
Trypanosomiasis in domestic animals of Makwanpur district, Nepal.	Maharjan	Annals of the New York Academy of Sciences	2006	Trypanosomiasis is an infectious emerging hemoprotozoan parasitic disease in domestical animals of Nepal. The prevalence of disease was found in 16 of 240 (6.67%) in domestic animals of Makawanpur district, out of which 9 of 105 were (8.57%) cattle; 5 of 75 (6.67%) buffalos, and 2 of 15 (13.3%) dogs, while none of the goats and pigs acquired infection. The disease was found maximum during rainy s…	0	1	0			0
Occurrence of hydatidosis in slaughter buffaloes (Bos bubalis) and helminths in stray dogs in Kathmandu Valley, Nepal.	Manandhar	Berliner und Munchener tierarztliche Wochenschrift	2006	The study aimed at identifying the occurrence of hydatidosis in slaughter buffaloes and helminth eggs, particularly Taenia spp. eggs in stray dogs' fecal samples in Kathmandu Valley, Nepal. The study period was from November, 2004 to April, 2005. A total of 500 buffalo carcasses in a slaughterhouse, at the riversides and individual butchers'sites were examined for the presence of hydatid cysts. T…	0	1	0			0
Rabies antibody seroprotection rates among travelers in Nepal: "rabies seroprotection in travelers".	Ranney	Journal of travel medicine	2006	BACKGROUND: Rabies preexposure immunization is recommended for international travelers who are at risk for exposure to rabid animals, especially in areas where postexposure treatment may be limited. Rabies antibody seroprotection rates among international travelers has not been previously investigated. OBJECTIVE: To assess preexisting rabies seroprotection among travelers presenting to a health c…	1	1	1	1	1	1	Prophylaxis, RIG
Dry season diets of sympatric ungulates in lowland Nepal: competition and facilitation in alluvial tall grasslands	Wegge	ECOLOGICAL RESEARCH	2006	Based on microhistological analyses of faecal material, we compared the early dry season diets of greater one-horned rhinoceros Rhinoceros unicornis, swamp deer Cervus duvauceli and hog deer Axis porcinus, which inhabit the same alluvial grassland habitat complex in lowland Nepal. Their diets were quite similar, both at the forage category level and within subcategories of graminoids and woody pl…	0	1	0			0
Assessing the safety of post-exposure rabies immunization in pregnancy	Arya	HUMAN VACCINES	2007	The efficacy of rabies vaccine derived from Vero cells and chick embryo cells and administered with or without immunoglobulin was remarkable among 14 pregnant women who were vaccinated following exposure to suspected, but not confirmed, rabid animals. Absence of adverse effects in the pregnant vaccinees and their young infants was remarkable. Information about the post-exposure immune response of…	1	1	1	1	1	1	No new info; Letter
Environmental hazards in Nepal: altitude illness, environmental exposures, injuries, and bites in travelers and expatriates.	Boggild	Journal of travel medicine	2007	BACKGROUND: Adventure travel necessarily places travelers at risk of environmental hazards. We assessed the burden of "environmental" hazards among a cohort of travelers and expatriates presenting to a large travel clinic in Nepal. METHODS: Data on travelers and expatriates seen at the Canadian International Water and Energy Consultants (CIWEC) clinic in Kathmandu were prospectively collected and…	1	1	1	1	1	1	Epidemiology, monkey bites in tourists
Rk39 dipstick test as a practical solution for canine leishmaniasis diagnosis among nomadic populations	Habibzadeh	JOURNAL OF ANIMAL AND VETERINARY ADVANCES	2007	Detection of clinical manifestations of leishmaniasis in dogs is difficult and not practical for screening nomadic dogs. Our aim of study was to check out the sensitivity and specificity of a commercially available immunochromatographic dipstick rk39 test compared to Direct Agglutination Test (DAT) used in canine visceral leishmaniasis diagnosis among nomad dogs. Three hundred and twenty nomad ho…	0	1	0			0
Evidence of brucellosis in human and animal in Nepal.	Joshi	Proceedings of the 12th International Conference of the Association of	2007	Brucella organism infects all species as human, cattle, buffalo, goat, dog, pig and man (OIE, 1998). It means approximately 25.8 million human beings and around 18.84 million of the livestock are susceptible to the disease indicating potent economic looser disease. In man it cause Malta or Mediterranean fever regarding as important zoonosis rendering serous health hazard and easily transferred fr…	0	1	0			0
Increased gastric-end Tidal P-CO2 gap during exercise at high altitude measured by gastric tonometry	Martin	HIGH ALTITUDE MEDICINE & BIOLOGY	2007	Using automated air gastric tonometry, the hypothesis that gastric perfusion. is reduced while exercising at high altitude was explored. This prospective observational study of 5 well acclimatized healthy volunteers was performed during a medical research expedition to Chamlang base camp (5000 m), Hongu valley, Nepal. We used gastric tonometry at rest and during graded submaximal exercise. The en…	0	1	0			0
Geographic Views on the Nepali Newspaper: An Analysis on Press Prints and Universal Understanding	Panday	The Third Pole: Journal of Geography Education	2007	The profession of newspaper has been becoming more challenging in recent years. In the underdeveloped country like Nepal, media has been misused, misguided and misbehaved. The big publishing house monopolized market. They have influenced in using government facilities and diverting people's attention towards their narrow interest of political nature. In fact, newspaper can play disaster role to d…	0	1	0			0
Asthma symptomatics school children of Sonapur.	Pokharel	Kathmandu University medical journal (KUMJ)	2007	BACKGROUND: Bronchial asthma is one of the most common illnesses in children. Factors influencing development of asthma have not been studied in rural population. MATERIALS AND METHODS: Two thousand school-going children from three schools of Sonapur VDC, Sunsari in the surrounding of industries were screened for the presence of symptoms of asthma using a questionnaire suggested by International …	0	1	0			0
Study of vegetation and grazing impacts on pheasant in Pipar Reserve, Nepal.	Poudyal	Tigerpaper (Bangkok)	2007	NA	0	1	0			0
Antibacterial and antiviral naphthazarins from Maharanga bicolor.	Rajbhandari	Die Pharmazie	2007	Maharanga bicolor, Boraginaceae, is used in the Nepalese ethnomedicine for the treatment of several diseases. In the course of screening investigations the dichloromethane extract of the roots of Maharanga bicolor was found to inhibit the growth of gram positive bacteria. Bio-assay directed fractionation led to the isolation of five active naphthazarins, deoxyalkannin (1), alkannin (2), acetylalk…	0	1	0			0
Bony hydatid disease of superior pubic ramus with extension into pelvis and proximal thigh.	Khan	JNMA; journal of the Nepal Medical Association	2008	Hydatid disease is caused by the tapeworm of genus ;Echinococcus. Genus Echinococcus has different species including Echinococcus vogeli, Echinococcus granulosus and Echinococcus multilucularis. Echinococcus granulosus is the most common cause of hydatid disease in humans. This disease can take place either directly through ingestion of parasite eggs from contact with infected dogs or indirectly …	0	1	0			0
Gross and histopathological findings in a puppy infected with canine distemper.	Singh	Intas Polivet	2008	A 9-week-old, male puppy purchased from a kennel (Katmandu, Nepal), was taken to a veterinarian for signs of oculonasal discharge, vomiting, and diarrhoea and complete anorexia. On clinical examination, the puppy appeared febrile, mucopurulent oculo nasal discharge and cough and, was vaccinated against rabies only. The dog was treated with Amoxicillin (10 mg/kg BW I/M for 4 days, and Cephalexin, …	0	1	0			0
An unusual presentation of hydatid cyst in anterior abdominal wall	Srivastava	Kathmandu University Medical Journal	2008	Hydatid disease is a parasitic infestation caused by the larval form of the cestode worm Echinococcus. The most commonly encountered form of the disease is visceral hydatid cyst caused by Echinococcus granulosus or dog tapeworm. Muscular involvement has been reported in only 3-4% cases. We are reporting this case because of its rarity, difficulty to diagnose clinically, dramatic response to medic…	0	1	0			0
The first imported case of rabies into Japan in 36 years: a forgotten life-threatening disease.	Yamamoto	Journal of travel medicine	2008	A domestic case of rabies has not been reported in Japan since 1957. The last case of rabies reported in Japan was an imported case from Nepal in 1970. We recently experienced a new case imported from the Philippines, the first case in Japan in 36 years. Although Japanese people are about to forget the dangers of rabies, this case should serve as a warning to those Japanese who are planning a tri…	1	1	1	1	1	1	Human rabies, traveler
Drug Resistance in Leishmania	Bhattacharjee	Antimicrobial Drug Resistance, Vol 1: Mechanisms of Drug Resistance	2009	NA	0	0	0			0
Kill rates and food consumption of leopards in Bardia National Park, Nepal	Odden	ACTA THERIOLOGICA	2009	This is the first study presenting data on kill rates and food consumption among Asian leopards Panthera pardus Linnaeus, 1758. In Bardia National Park, Nepal, we found leopard kills by searching within areas with clusters of locations from radio collared leopards (2 males and 1 female with 2 cubs aged 4-9 months). We used two tracking schemes, 24-h intensive radio-tracking and daily monitoring, …	0	1	0			0
Endangered Asiatic wild dog (Cuon alpinus) needs conservation in eastern India	Selvan	CURRENT SCIENCE	2009	NA	0	0	0			0
Ethnobotany of Dioscorea L. with emphasis on food value in Chepang communities in Dhading district, central Nepal	Sharma	Botanica Orientalis: Journal of Plant Science	2009	Chepang, inhabiting the rugged terrain of Mahabharat and Churia range in central Nepal, is a group of indigenous people suffering from severe food insecurity. Their ancestors lived a semi-nomadic life up to one and half century back. To a large extent, Chepang still continue their traditional way of living, which includes collection of wild tubers (‘kandamul'), hunting and fishing. Chepangs are e…	0	1	0			0
Occurrence of Salmonella in drinking water samples of urban water supply system of Kathmandu	Shrestha	Botanica Orientalis: Journal of Plant Science	2009	Water-borne diseases are among the leading causes of morbidity and mortality in developing countries and around 2.2 million people die every year due to basic hygiene-related diseases, like gastroenteritis, diarrhea, typhoid and dysentery. Eighty-six water samples were randomly collected from urban water supply system of Kathmandu, and analyzed for physiochemical and microbiological parameters to…	0	1	0			0
Fingermillet harvesting and threshing in Karnataka.	Sreenatha	International Journal of Agricultural Engineering	2010	Finger millet also known as Ragi or Mandwa is the most important small millet food and fodder crop. It is extensively cultivated in Asian countries like India, Ceylon, Malaysia, China, Nepal and Japan and African countries. It is widely grown in Karnataka, Tamil Nadu, Andhra Pradesh, Orissa, Bihar, Gujarat and Maharashtra and in the hilly regions of Uttar Pradesh, Sikkim and Himachal Pradesh. Kar…	0	0	0			0
IS SUDANESE VISCERAL LEISHMANIASIS DIFFERENT FROM VL ON THE INDIAN SUBCONTINENT?	Zijlstra	AMERICAN JOURNAL OF TROPICAL MEDICINE AND HYGIENE	2010	NA	0	0	0			0
Human Rabies in the WHO Southeast Asia Region: Forward Steps for Elimination.	Gongal	Advances in preventive medicine	2011	There are eleven Member States in the WHO southeast Asia region (Bangladesh, Bhutan, Democratic People's Republic of Korea, India, Indonesia, Maldives, Myanmar, Nepal, Sri Lanka, Thailand, Timor-Leste) of which eight are endemic for rabies. More than 1.4 billion people in the Region are at risk of rabies infection, and approximately 45% of worldwide rabies deaths occur in Asia. Dog bites account …	1	1	1	1	1	1	Epidemiology; Control
The Pack Hunter (Dhole): Received Little Scientific Attention	Khatiwada	The Initiation	2011	The dholes received little scientific attention due to the lower charisma factor than other larger carnivores found in the same areas like Tiger and Snow Leopard. This is the first study of dholes that was conducted in Kanchenjunga Conservation Area (KCA), Nepal in 2010. Camera trapping, sign survey, interview and group discussion with local people were carried out to assess the presence/absence …	0	1	0			0
Characterization of rabies virus from a human case in Nepal.	Pant	Archives of virology	2011	Rabies is endemic throughout most of Asia, with the majority of human cases transmitted by domestic dogs (Canis familiaris). Here, we report a case of rabies in a 12-year-old girl in the Lalitpur district of Nepal that might have been prevented by better public awareness and timely post-exposure prophylaxis. Molecular characterization of the virus showed 100% identity over a partial nucleoprotein…	1	1	1	1	1	1	Epidemiology, molecular
Bladder stones in a female dog and its surgical removal.	Saroj Yadav	Intas Polivet	2011	A case of urolithiasis in a 10 year old female dog and the surgical intervention is reported and discussed. The urinary calculi were removed surgically and the dog was discharged after 3 days with antibiotics and Neeri tablets for 10 days. On follow up examination the dog was healthy and had normal urination. Surgical intervention and therapeutic management as a combination therapy was found effe…	0	1	0			0
Visceral Leishmaniasis in Far Western Nepal: Another Case and Concerns about a New Area of Endemicity	Schwarz	AMERICAN JOURNAL OF TROPICAL MEDICINE AND HYGIENE	2011	NA	0	1	0			0
Molecular Characterization of Rabies Virus from Nepal	Stevens	ECOHEALTH	2011	Rabies virus is a lyssavirus (genotype 1) from the family Rhabdoviridae. It contains a single-stranded negative sense RNA genome of approximately 12 kb in size. This zoonotic disease infects domestic and wild animals, and is spread to people through close contact with infected saliva (via bites or scratches). The disease is present in nearly every continent with more than 55,000 people dying of r…	1	1	1	1	1	1	Epidemiology, molecular; Meeting abstract, Conference Poster
Canine fetal mummification.	Bindari	International Journal of Veterinary Science	2012	This paper reports on a case of canine fetal mummification which is very rare. A Japanese Spitz aged 5 year was brought to the clinic of Mount Everest Kennel Club. Breeding history of dog was obtained from the owner. X-ray confirmed the presence of fetus. Exploratory laparotomy was done under general anesthesia. Five mummified fetuses were observed. Ovariohysterectomy and corrective surgery were …	0	1	0			0
Prevalence of mange infestation in canines of Kathmandu Valley.	Bindari	International Journal of Veterinary Science	2012	A study on prevalence of mange infestation was conducted in canines of Kathmandu Valley. A total of 120 samples of suspected positive cases were taken from the dogs for study. Out of total the samples collected, 60 were from owned dogs (CVH - 30, Mount Everest Kennel Club - 22 and Veterinary Clinic - 8) and 60 from stray dogs (KAT - 30 and Animal Nepal - 30). The result showed that 56% and 67% sa…	0	1	0			0
The Vulnerable red panda Ailurus fulgens in Bhutan: distribution, conservation status and management recommendations	Dorji	ORYX	2012	The red panda Ailurus fulgens is categorized as Vulnerable on the IUCN Red List. Pressurized by an expanding human population, it is mainly threatened by habitat destruction, with,10,000 mature individuals remaining. The red panda has been studied in India, China, Nepal and, to a lesser extent, Myanmar, but no research has been published on this species in Bhutan. Here, we report on the current d…	0	0	0			0
Random Amplification of Polymorphic DNA Analysis for Genetic Characterization of Two Breeds of Dogs, German Shepherd and Japanese Spitz	Joshsi	Nepal Journal of Science and Technology	2012	Random amplified polymorphic DNA (RAPD) markers were used to study genetic diversity in dog samples belonging to populations of German Shepherd and Japanese Spitz. A total of twelve samples were typed using eight RAPD primers. Out of eight primers, three primers gave result in six individuals of dogs. The phylogenetic tree constructed by the neighbor joining method based on Nei. Original measures…	0	1	0			0
In memoriam - Colin Kaplan (1920-2012)	Kaplan	JOURNAL OF GENERAL VIROLOGY	2012	NA	0	0	0			0
Production of tissue culture rabies vaccine for human use in Nepal	Pant	INTERNATIONAL JOURNAL OF INFECTIOUS DISEASES	2012	NA	1	1	1	0	1	1	Prophylaxis; Meeting abstract, Conference Poster
Intramedullary pinning and use of cerclage wires for the management of diaphyseal comminuted femoral fracture in a dog.	Singh	Intas Polivet	2012	A one year old male dog sustained diaphyseal comminuted femoral fracture due to accident with car. The diagnosis was made by latero-medial radiographic evaluation. The fracture was stabilized by intramedullary pinning and use of cerclage wires. Intramedullary pin was removed after taking radiograph and clinical evidence of improvements. Animal recovered but free difficulty in jumping and climbini…	0	1	0			0
Review of Rabies Epidemiology and Control in South, South East and East Asia: Past, Present and Prospects for Elimination	Tenzin	ZOONOSES AND PUBLIC HEALTH	2012	Rabies is a serious public health problem in Asia. It causes substantial animal welfare, economic and human health impacts, with approximately 39 000 human deaths each year. Domestic dogs are the main reservoir and source of rabies in Asia. Common constraints for the control of rabies in the countries of Asia include inadequate resources; lack of political commitment to control programs; lack of …	1	1	1	1	1	1	Introduction
Modern vaccines/adjuvants formulation Session 6: vaccine and adjuvant formulation and production-17 May 2013, Lausanne, Switzerland	Fox	HUMAN VACCINES & IMMUNOTHERAPEUTICS	2013	The Modern Vaccines/Adjuvants Formulation meeting aims to fill a critical gap in current vaccine development efforts by bringing together formulation scientists and immunologists to emphasize the importance of rational formulation design in order to optimize vaccine and adjuvant bioactivity, safety, and manufacturability. Session 6 on Vaccine and Adjuvant Formulation and Production provided three…	1	1	1	1	1	1	Prophylaxis
Advancing Sino-Indian Cooperation to Combat Tropical Diseases	Hotez	PLOS NEGLECTED TROPICAL DISEASES	2013	NA	0	1	0			0
Dog Rabies and Its Control	Knobel	Rabies: Scientific Basis of the Disease and Its Management, 3rd Edition	2013	Domestic dogs are the major reservoir of rabies virus across much of its range, and are responsible for the majority of human exposures. The control of the disease in domestic dogs thus has important implications for public health, particularly in Africa and Asia where canine rabies is endemic. Dog rabies control measures have the ultimate objective of decreasing the burden of human rabies, and o…	1	1	0	1	0	0	Book chapter [Rabies: Scientific Basis of the Disease and its Management]
Intramedullary pinning for surgical correction of condylar fracture in a dog.	Kshitiz Shrestha	Intas Polivet	2013	Management of a condylar fracture was done by intramedullary pinning in two years old and 25 kg weighted German shepherd with history of hit by motor vehicle. Radiograph examination revealed complete oblique condylar fracture and the management was done via open reduction method. Under general anesthesia, the femoral diaphysis and metaphysis was approached through a cranio-lateral skin incision o…	0	1	0			0
Travel-associated Illness Trends and Clusters, 2000-2010	Leder	EMERGING INFECTIOUS DISEASES	2013	Longitudinal data examining travel-associated illness patterns are lacking. To address this need and determine trends and clusters in travel-related illness, we examined data for 2000-2010, prospectively collected for 42,223 ill travelers by 18 GeoSentinel sites. The most common destinations from which ill travelers returned were sub-Saharan Africa (26%), Southeast Asia (17%), south-central Asia …	0	1	0
Common and snow leopards share prey, but not habitats: competition avoidance by large predators?	Lovari	JOURNAL OF ZOOLOGY	2013	Resource exploitation and behavioural interference underlie competition among carnivores. Competition is reduced by specializing on different prey and/or spatio-temporal separation, usually leading to different food habits. We predicted that two closely related species of large cats, the endangered snow leopard and the near-threatened common leopard, living in sympatry, would coexist through habi…	0	1	0			0
Therapeutic Options for Visceral Leishmaniasis	Monge-Maillo	DRUGS	2013	Visceral leishmaniasis (VL), also known as Kala-Azar, is a disseminated protozoal infection caused principally by Leishmania donovani and Leishmania infantum (known as Leishmania chagasi in South America). The therapeutic options for VL are diverse and depend on different factors, such as the geographical area of the infection, development of resistance to habitual treatments, HIV co-infection, m…	0	1	0			0
Recent emergence and spread of an Arctic-related phylogenetic lineage of rabies virus in Nepal.	Pant	PLoS neglected tropical diseases	2013	Rabies is a zoonotic disease that is endemic in many parts of the developing world, especially in Africa and Asia. However its epidemiology remains largely unappreciated in much of these regions, such as in Nepal, where limited information is available about the spatiotemporal dynamics of the main etiological agent, the rabies virus (RABV). In this study, we describe for the first time the phylog…	1	1	1	1	1	1	Epidemiology, molecular
Prevalence of gastrointestinal zoonotic helminths in dogs of Kathmandu, Nepal	Satyal	International Journal of Infection and Microbiology	2013	INTRODUCTION: Considering the close association of dog and human beings and increasing trend of pet rearing, it is important to know the status of zoonotic helminths of pet and stray dogs and awareness of owners about this in Kathmandu, Nepal. This study was carried out to determine the prevalence of gastrointestinal zoonotic helminth parasites in dogs and to assess the awareness about canine hel…	0	1	0			0
A Knowledge and Practices study of health hazards among animal handlers in zoological gardens	Bagaria	International Journal of Occupational Safety and Health	2014	Background- Close association with animals makes zookeepers a high risk group for suffering from various zoonotic diseases. Thus, it is important that they are able to protect themselves from these diseases and injuries through prevention awareness. Objective- To study the knowledge, attitude and practices regarding health hazards among animal handlers in zoological gardens. Materials and Methods…	1	0	0
Epidemiology of rabies in Taiwan and the capacity building of rabies diagnosis in Japan.	Inoue	Journal of Veterinary Epidemiology	2014	Taiwan has been considered canine rabies free for 52 years after the elimination of endemic dog rabies in 1961. However, three ferret-badgers ( Melogale moschata) were confirmed as rabies and reported to OIE by Taiwan government on July 17, 2013. This was the first rabies positive during rabies test under the surveillance of animals from 1999 in Taiwan. Through inter-ministerial collaboration by …	1	1	1	1	1	1	Human rabies, traveler; Article in Japanese
Mutagenic effects of MH and MMS on induction of variability in broad bean ( Vicia faba L.).	Laskar	Annual Research & Review in Biology	2014	Aims: An experiment was conducted to find out the comparative response of MMS and MH on Vicia faba L. var. Nepal Selection with a view to determine the mutagen and treatment causing maximum bio-physiological and cyto-morphological variation as compared to the control for genetic improvement of crop. Study Design: Induced mutation breeding study. Place and Duration of Study: Mutation Breeding Labo…	0	1	0			0
Evaluation of intradermal vaccination at the anti rabies vaccination OPD.	Mankeshwar	Nepal Med Coll J	2014	Rabies is a virtually 100% fatal acute viral encephalitis caused by an RNA virus belonging to family Rhabdoviridae and genus Lyssavirus. The virus can infect all warm blooded animals. The disease is transmitted to humans by the bite, lick or scratch of an infected animal. More than 99% of all human rabies deaths occur in the developing world. It is preventable with timely and proper usage of mode…	1	0	0
Sero-prevalence of leptospiral infection in canine population of Kathmandu valley.	Thakur	Nepalese Journal of Agricultural Sciences	2014	To determine the status of Leptospiral infection in a canine population of Kathmandu valley, a rapid diagnostic test kit was used to detect Ig antibodies in sera samples. Altogether a total of 150 sera samples were collected from the pet and stray dogs brought to the Veterinary Hospitals and Clinics with the history of fever and jaundice. Screening of all sera samples by the rapid diagnostic test…	0	1	0			0
Premonsoon precipitation variability in Kumaon Himalaya, India over a perspective of similar to 300 years	Yadav	QUATERNARY INTERNATIONAL	2014	Variability in premonsoon precipitation, which has direct impact on rabi crop productivity in the Himalayan region, is not well understood in a long-term perspective, largely due to the paucity of weather data. We developed an annually resolved February-May (FM) precipitation record extending back to AD 1730 using tree-ring width data of Himalayan cedar for the first time from the Kumaon region, …	0	0	0			0
Survey on street dog population in Pokhara Valley of Nepal.	Acharya	Bangladesh Journal of Veterinary Medicine	2015	A survey was carried out to determine the population of street dogs and people's opinion about their persistence in Pokhara Valley, Nepal. Information of street dog population was necessary to construct a future animal birth control (ABC) plans. For this, mark-resight survey method was used. Further, local residents were interviewed to know their opinion about the persistence of street dog popula…	1	1	1	1	1	1	Epidemiology, dog population
Reinstatement of Dermacentor bellulus (Acari: Ixodidae) as a Valid Species Previously Confused with D. taiwanensis and Comparison of All Parasitic Stages	Apanaskevich	JOURNAL OF MEDICAL ENTOMOLOGY	2015	Re-examination of Dermacentor taiwanensis Sugimoto, 1935 specimens in the United States National Tick Collection revealed that two morphologically distinct Dermacentor species were identified under this name. One of them corresponds to Sugimoto's description of D. taiwanensis, while another species is identical to Schulze's Dermacentor bellulus (Schulze, 1935). The latter species has not been con…	0	1	0			0
Habitat selection and feeding ecology of dhole (Cuon alpinus) in the Himalayas	Aryal	JOURNAL OF MAMMALOGY	2015	The Asiatic wild dog or dhole (Cuon alpinus) is an endangered, yet little-studied, species throughout its range in Nepal. We examined habitat selection and diet of the dholes by searching for dholes in the Dhorpatan Hunting Reserve (DHR), the only hunting reserve in Nepal, and developed a habitat selection model to determine their habitat preferences. We also collected anecdotal data on depredati…	0	1	0			0
Animal-associated exposure to rabies virus among travelers, 1997-2012.	Gautret	Emerg Infect Dis	2015	Among travelers, rabies cases are rare, but animal bites are relatively common. To determine which travelers are at highest risk for rabies, we studied 2,697 travelers receiving care for animal-related exposures and requiring rabies postexposure prophylaxis at GeoSentinel clinics during 1997-2012. No specific demographic characteristics differentiated these travelers from other travelers seeking …	1	1	1	1	1	1	Epidemiology, monkey bites in tourists
Vector and reservoir control for preventing leishmaniasis.	González	Cochrane Database Syst Rev	2015	BACKGROUND: Leishmaniasis is caused by the Leishmania parasite, and transmitted by infected phlebotomine sandflies. Of the two distinct clinical syndromes, cutaneous leishmaniasis (CL) affects the skin and mucous membranes, and visceral leishmaniasis (VL) affects internal organs. Approaches to prevent transmission include vector control by reducing human contact with infected sandflies, and reser…	0	1	0			0
Multiple recurrent cerebral hydatidosis: A case report with review of literature	Nikhita	Asian Journal of Medical Sciences	2016	Echinococcisis is an emerging zoonotic parasitic disease worldwide and is a significant health burden among developing nations. Cystic hydatidosis is more commonly found in lungs and liver but rarely cerebral involvement can occur. Multiple hydatid cysts of brain are uncommon and may be wither primary or secondary. Hydatid cyst shoud be considered as a differential diagnosis for cystic lesions of…	0	0	0			0
